# Supplementary material for: Biomartr: genomic data retrieval with R
Source: PubMed Central journal article supplement — Bioinformatics. 2017 Jan 20;33(8):1216–7. doi: 10.1093/bioinformatics/btw821 (PMC5408848; doi:10.1093/bioinformatics/btw821), 2017-01-20
Supplement: btw821_supp.pdf [file btw821_supp.pdf]

# Introduction to the biomartr Package

2016-12-15

## Getting Started

A major problem in bioinformatics research is consistent data retrieval. The **biomartr** package therefore, aims to provide users with easy to use and diverse interfaces to well curated genomic databases such as:

- NCBI
- ENSEMBL
- ENSEMBLGENOMES
- BioMart
- Gene Ontology

The collection of functions implemented in **biomartr** enable fast and consistent functional annotation and data retrieval queries for a set of genes, entire genomes or meta-genome projects.

## Biological Sequence Retrieval

In the post-genomic era, biological sequences are used to investigate most phenomena of molecular biology. The growing number of databases and their entries allows us to design meta-studies in a new dimension and to re-investigate known phenomena from a new perspective. Nevertheless, from a data science point of view this vast amount of heterogenous data, coming from very different data resources and data standards is very hard to transform from heterogenous to homogenous data. The detection of significant patterns within meta-analyses, therefore relies on high quality data analysis and data science.

Another aspect is reproducibility. Even in cases where a high degree of data homogeneity is achieved, the aspect of scientific reproducibility adds up to a new layer of complexity. Much effort is now being invested to enable high standards of reproducibility in data driven sciences (e.g. ROpenSci). The **biomartr** package aims to be a part of this data science movement. It's functions implement interfaces (Application Programming Interfaces, short *APIs*) to major databases such as NCBI, ENSEMBL and ENSEMBLGENOMES allowing users to access curated data from major genome data sources.

The Sequence Retrieval and Metagenome Retrieval vignettes will introduce users to the process of genomic sequence retrieval using **biomartr**. All functions were designed to allow users to achieve the highest (yet possible) degree of reproducibility and transparency for their own analyses.

## Installation

Before users can download and install **biomartr** they need to install the following packages from Bioconductor:

```
# install Bioconductor base packages
source("http://bioconductor.org/biocLite.R")
biocLite()

# load the biomaRt package
source("http://bioconductor.org/biocLite.R")
biocLite("biomaRt")

# load the Biostrings package
source("http://bioconductor.org/biocLite.R")
biocLite("Biostrings")
```

Users might be asked during the installation process of `Biostings` and `biomaRt` whether or not they would like to update all package dependencies of the corresponding packages. Please type a specifying that all package dependencies of the corresponding packages shall be updated. This is important for the sufficient functionality of `biomartr`.

Now users can download `biomartr` from CRAN :

```
install.packages("biomartr", dependencies = TRUE)
```

## Please Note

When using the `biomartr` functions please be aware that an unstable internet connection can cause that some functions will not terminate properly. In that case, please re-run the corresponding function and try to use `biomartr` with a stable internet connection. In other cases, the NCBI or ENSEMBL servers are overloaded and not very responsive causing some `biomartr` functions to fail as well. When this happens, it is best to re-run the functions a few hours later when the query load to the NCBI or ENSEMBL servers are reduced.

## Retrieve Sequence Databases from NCBI

NCBI stores a variety of specialized database such as Genbank, RefSeq, Taxonomy, SNP, etc. on their servers. The `download.database()` and `download.database.all()` functions implemented in `biomartr` allows users to download these databases from NCBI.

### Search for available databases

Before downloading specific databases from NCBI users might want to list available databases. Using the `listDatabases()` function users can retrieve a list of available databases stored on NCBI.

```
library("biomartr")

# retrieve a list of available sequence databases at NCBI
listDatabases(db = "all")

[1] "16SMicrobial"      "cdd_delta"
[3] "cloud"             "env_nr"
[5] "env_nt"            "est"
[7] "est_human"         "est_mouse"
[9] "est_others"        "FASTA"
[11] "gene_info"         "gss"
[13] "gss_annot"         "htgs"
[15] "human_genomic"     "human_genomic_transcript"
[17] "landmark"          "mouse_genomic_transcript"
[19] "nr"                 "nt"
[21] "other_genomic"     "pataa"
[23] "patnt"              "pdbaa"
[25] "pdbnt"              "ref_prok_rep_genomes"
[27] "ref_viroids_rep_genomes" "ref_viruses_rep_genomes"
[29] "refseq_genomic"    "refseq_protein"
[31] "refseq_rna"         "refseqgene"
[33] "sts"                "swissprot"
[35] "taxdb"              "tsa_nr"
[37] "tsa_nt"             "vector"
```

However, in case users already know which database they would like to retrieve they can filter for the exact files by specifying the NCBI database name. In the following example all sequence files that are part of the NCBI nr database shall be retrieved.

First, the `listDatabases(db = "nr")` allows to list all files corresponding to the nr database.

```
# show all NCBI nr files  
listDatabases(db = "nr")
```

```
[1] "nr.00.tar.gz" "nr.01.tar.gz" "nr.02.tar.gz" "nr.03.tar.gz" "nr.04.tar.gz" "nr.05.tar.gz"  
[7] "nr.16.tar.gz" "nr.06.tar.gz" "nr.15.tar.gz" "nr.30.tar.gz" "nr.07.tar.gz" "nr.08.tar.gz"  
[13] "nr.09.tar.gz" "nr.10.tar.gz" "nr.11.tar.gz" "nr.12.tar.gz" "nr.13.tar.gz" "nr.14.tar.gz"  
[19] "nr.28.tar.gz" "nr.29.tar.gz" "nr.31.tar.gz" "nr.17.tar.gz" "nr.18.tar.gz" "nr.19.tar.gz"  
[25] "nr.20.tar.gz" "nr.21.tar.gz" "nr.22.tar.gz" "nr.23.tar.gz" "nr.32.tar.gz" "nr.24.tar.gz"  
[31] "nr.25.tar.gz" "nr.26.tar.gz" "nr.27.tar.gz" "nr.33.tar.gz" "nr.34.tar.gz" "nr.35.tar.gz"  
[37] "nr.36.tar.gz" "nr.37.tar.gz" "nr.38.tar.gz" "nr.39.tar.gz" "nr.40.tar.gz" "nr.41.tar.gz"
```

The output illustrates that the NCBI nr database has been separated into 41 files.

Further examples are:

```
# show all NCBI nt files  
listDatabases(db = "nt")
```

```
[1] "nt.00.tar.gz" "nt.01.tar.gz" "nt.02.tar.gz" "nt.03.tar.gz" "nt.04.tar.gz" "nt.05.tar.gz"  
[7] "nt.06.tar.gz" "nt.07.tar.gz" "nt.08.tar.gz" "nt.09.tar.gz" "nt.10.tar.gz" "nt.11.tar.gz"  
[13] "nt.12.tar.gz" "nt.13.tar.gz" "nt.14.tar.gz" "nt.15.tar.gz" "nt.16.tar.gz" "nt.26.tar.gz"  
[19] "nt.27.tar.gz" "nt.17.tar.gz" "nt.18.tar.gz" "nt.28.tar.gz" "nt.29.tar.gz" "nt.19.tar.gz"  
[25] "nt.20.tar.gz" "nt.21.tar.gz" "nt.22.tar.gz" "nt.23.tar.gz" "nt.24.tar.gz" "nt.25.tar.gz"  
[31] "nt.30.tar.gz" "nt.31.tar.gz" "nt.32.tar.gz" "nt.33.tar.gz"
```

```
# show all NCBI ESTs others  
listDatabases(db = "est_others")
```

```
[1] "est_others.00.tar.gz" "est_others.01.tar.gz" "est_others.02.tar.gz" "est_others.03.tar.gz"  
[5] "est_others.04.tar.gz" "est_others.05.tar.gz" "est_others.06.tar.gz" "est_others.07.tar.gz"  
[9] "est_others.08.tar.gz" "est_others.09.tar.gz" "est_others.10.tar.gz"
```

```
# show all NCBI RefSeq (only genomes)  
head(listDatabases(db = "refseq_genomic"), 20)
```

```
[1] "refseq_genomic.00.tar.gz" "refseq_genomic.01.tar.gz" "refseq_genomic.02.tar.gz"  
[4] "refseq_genomic.03.tar.gz" "refseq_genomic.04.tar.gz" "refseq_genomic.05.tar.gz"  
[7] "refseq_genomic.06.tar.gz" "refseq_genomic.07.tar.gz" "refseq_genomic.08.tar.gz"  
[10] "refseq_genomic.09.tar.gz" "refseq_genomic.10.tar.gz" "refseq_genomic.11.tar.gz"  
[13] "refseq_genomic.12.tar.gz" "refseq_genomic.13.tar.gz" "refseq_genomic.14.tar.gz"  
[16] "refseq_genomic.15.tar.gz" "refseq_genomic.16.tar.gz" "refseq_genomic.17.tar.gz"  
[19] "refseq_genomic.18.tar.gz" "refseq_genomic.19.tar.gz"
```

```
# show all NCBI RefSeq (only proteomes)  
listDatabases(db = "refseq_protein")
```

```
[1] "refseq_protein.00.tar.gz" "refseq_protein.01.tar.gz" "refseq_protein.02.tar.gz"  
[4] "refseq_protein.03.tar.gz" "refseq_protein.04.tar.gz" "refseq_protein.05.tar.gz"  
[7] "refseq_protein.06.tar.gz" "refseq_protein.07.tar.gz" "refseq_protein.08.tar.gz"  
[10] "refseq_protein.09.tar.gz" "refseq_protein.14.tar.gz" "refseq_protein.15.tar.gz"  
[13] "refseq_protein.16.tar.gz" "refseq_protein.10.tar.gz" "refseq_protein.11.tar.gz"  
[16] "refseq_protein.17.tar.gz" "refseq_protein.12.tar.gz" "refseq_protein.13.tar.gz"  
[19] "refseq_protein.18.tar.gz" "refseq_protein.19.tar.gz"
```

```

# show all NCBI RefSeq (only RNA)
listDatabases(db = "refseq_rna")

[1] "refseq_rna.00.tar.gz" "refseq_rna.01.tar.gz" "refseq_rna.02.tar.gz" "refseq_rna.05.tar.gz"
[5] "refseq_rna.03.tar.gz" "refseq_rna.06.tar.gz" "refseq_rna.04.tar.gz" "refseq_rna.07.tar.gz"

# show NCBI swissprot
listDatabases(db = "swissprot")

[1] "swissprot.tar.gz"

# show NCBI PDB
listDatabases(db = "pdb")

[1] "pdbnt.00.tar.gz" "pdbnt.26.tar.gz" "pdbnt.27.tar.gz" "pdbnt.01.tar.gz" "pdbnt.02.tar.gz"
[6] "pdbnt.03.tar.gz" "pdbnt.04.tar.gz" "pdbnt.05.tar.gz" "pdbnt.06.tar.gz" "pdbnt.07.tar.gz"
[11] "pdbnt.08.tar.gz" "pdbnt.09.tar.gz" "pdbnt.10.tar.gz" "pdbnt.11.tar.gz" "pdbnt.12.tar.gz"
[16] "pdbnt.13.tar.gz" "pdbnt.14.tar.gz" "pdbnt.15.tar.gz" "pdbnt.16.tar.gz" "pdbnt.17.tar.gz"
[21] "pdbnt.18.tar.gz" "pdbnt.28.tar.gz" "pdbnt.19.tar.gz" "pdbnt.20.tar.gz" "pdbnt.21.tar.gz"
[26] "pdbnt.22.tar.gz" "pdbnt.23.tar.gz" "pdbnt.24.tar.gz" "pdbnt.29.tar.gz" "pdbnt.25.tar.gz"
[31] "pdbaa.tar.gz" "pdbnt.30.tar.gz" "pdbnt.31.tar.gz" "pdbnt.32.tar.gz" "pdbnt.33.tar.gz"

# show NCBI Human database
listDatabases(db = "human")

[1] "human_genomic.00.tar.gz" "human_genomic.01.tar.gz"
[3] "human_genomic.02.tar.gz" "human_genomic.03.tar.gz"
[5] "human_genomic.04.tar.gz" "human_genomic.05.tar.gz"
[7] "human_genomic.06.tar.gz" "human_genomic.07.tar.gz"
[9] "human_genomic.08.tar.gz" "human_genomic_transcript.tar.gz"
[11] "human_genomic.10.tar.gz" "human_genomic.11.tar.gz"
[13] "human_genomic.12.tar.gz" "human_genomic.13.tar.gz"
[15] "human_genomic.14.tar.gz" "human_genomic.15.tar.gz"

# show NCBI EST databases
listDatabases(db = "est")

[1] "est.tar.gz" "est_human.00.tar.gz" "est_human.01.tar.gz" "est_mouse.tar.gz"
[5] "est_others.00.tar.gz" "est_others.01.tar.gz" "est_others.02.tar.gz" "est_others.03.tar.gz"
[9] "est_others.04.tar.gz" "est_others.05.tar.gz" "est_others.06.tar.gz" "est_others.07.tar.gz"
[13] "est_others.08.tar.gz" "est_others.09.tar.gz" "est_others.10.tar.gz"

```

Please not that all lookup and retrieval function will only work properly when a sufficient internet connection is provided.

In a next step users can use the `listDatabases()` and `download.database.all()` functions to retrieve all files corresponding to a specific NCBI database.

## Download available databases

Using the same search strategy by specifying the database name as described above, users can now download these databases using the `download.database()` function.

For downloading only single files users can type:

```

# select NCBI nr version 27 = "nr.27.tar.gz"
# and download it into the folder

```

```
download.database(db      = "nr.27.tar.gz",
                 path     = "nr")
```

Using this command first a folder named `nr` is created and the file `nr.27.tar.gz` is downloaded to this folder. This command will download the pre-formatted (by `makeblastdb` formatted) database version is retrieved.

Alternatively, users can retrieve all `nr` files with one command by typing:

```
# download the entire NCBI nr database
download.database.all(db = "nr", path = "nr")
```

Using this command, all NCBI `nr` files are loaded into the `nr` folder (`path = "nr"`).

The same approach can be applied to all other databases mentioned above, e.g.:

```
# download the entire NCBI nt database
download.database.all(db = "nt", path = "nt")
```

```
# download the entire NCBI refseq (protein) database
download.database.all(db = "refseq_protein", path = "refseq_protein")
```

```
# download the entire NCBI PDB database
download.database.all(db = "pdb", path = "pdb")
```

Please notice that most of these databases are very large, so users should take of of providing a stable internet connection throughout the download process.

## Biological Sequence Retrieval

The `biomartr` package allows users to retrieve biological sequences in a very simple and intuitive way.

Using `biomartr`, users can retrieve either genomes, proteomes, or CDS data using the specialized functions:

- `getGenome()`
- `getProteome()`
- `getCDS()`
- `getGFF()`

## Getting Started with Sequence Retrieval

First users can check whether or not the genome, proteome, or CDS of their interest is available for download.

Using the scientific name of the organism of interest, users can check whether the corresponding genome is available via the `is.genome.available()` function.

Please note that the first time you run this command it might take a while, because during the initial execution of this function all necessary information is retrieved from NCBI and then stored locally. All further runs are then much faster.

Example `refseq`:

```
# checking whether or not the Homo sapiens
# genome is available for download
is.genome.available("Homo sapiens", db = "refseq")
```

```
[1] TRUE
```

Example `genbank`:

```
# checking whether or not the Homo sapiens
# genome is available for download
is.genome.available("Homo sapiens", db = "genbank")
```

```
[1] TRUE
```

## Using `is.genome.available()` with ENSEMBL and ENSEMBLGENOMES

Users can also specify `db = "ensembl"` or `db = "ensemblgenomes"` to retrieve available organisms provided by ENSEMBL or ENSEMBLGENOMES. Again, users might experience a delay in the execution of this function when running it for the first time. This is due to the download of ENSEMBL or ENSEMBLGENOMES information which is then stored internally to enable a much faster execution of this function in following runs. The corresponding information files are stored at `file.path(tempdir(), "ensembl_summary.txt")` and `file.path(tempdir(), "ensemblgenomes_summary.txt")`.

Example ENSEMBL:

```
# checking whether Homo sapiens is available in the ENSEMBL database
is.genome.available("Homo sapiens", db = "ensembl")
```

```
[1] TRUE
```

```
# retrieve details for Homo sapiens
is.genome.available("Homo sapiens", db = "ensembl", details = TRUE)
```

| division        | taxon_id                                                                  | name              | release | display_name | accession        | common_name |
|-----------------|---------------------------------------------------------------------------|-------------------|---------|--------------|------------------|-------------|
| 1               | Ensembl                                                                   | 9606 homo_sapiens | 86      | Human        | GCA_000001405.22 | human       |
| aliases         |                                                                           |                   |         |              |                  |             |
| 1               | homo, homo sapiens, h_sapiens, enshs, human, hsap, 9606, homsap, hsapiens |                   |         |              |                  |             |
| groups assembly |                                                                           |                   |         |              |                  |             |
| 1               | core, cdna, vega, otherfeatures, rnaseq, variation, funcgen GRCh38        |                   |         |              |                  |             |

Example ENSEMBLGENOMES:

For example, some species that cannot be found at `db = "ensembl"` might be available at `db = "ensemblgenomes"` and vice versa. So I recommend users to check in both databases ENSEMBL and ENSEMBLGENOMES whether or not a particular species is present. In case of "Homo sapiens", the genome is available at `db = "ensembl"` but **not** at `db = "ensemblgenomes"` whereas the genome of "Arabidopsis thaliana" is available at `db = "ensemblgenomes"` but **not** at `db = "ensembl"`.

```
# checking whether Homo sapiens is available in the ENSEMBLGENOMES database
is.genome.available("Homo sapiens", db = "ensemblgenomes")
```

Error: Unfortunately organism 'Homo sapiens' is not available at ENSEMBLGENOMES. Please check whether or not the organism name is typed correctly.

```
# checking whether Arabidopsis thaliana is available in the ENSEMBLGENOMES database
is.genome.available("Arabidopsis thaliana", db = "ensemblgenomes")
```

```
[1] TRUE
```

```
# show details for Arabidopsis thaliana
is.genome.available("Arabidopsis thaliana", db = "ensemblgenomes", details = TRUE)
```

| division | taxon_id      | name                      | release | display_name         |
|----------|---------------|---------------------------|---------|----------------------|
| <chr>    | <int>         | <chr>                     | <int>   | <chr>                |
| 1        | EnsemblPlants | 3702 arabidopsis_thaliana | 85      | Arabidopsis thaliana |

Please note that the detailed information provided by ENSEMBL or ENSEMBL genomes differs from the information provided by NCBI.

By specifying the `details = TRUE` argument, the genome file size as well as additional information can be printed to the console.

```
# printing details to the console
is.genome.available("Homo sapiens", details = TRUE, db = "refseq")

  assembly_accession  bioproject    biosample      wgs_master
                   <chr>         <chr>         <chr>         <chr>
1  GCF_000001405.35   PRJNA168      <NA>          <NA>
2  GCF_000306695.2   PRJNA178030   SAMN02205338  AMYH00000000.2
with 25 more variables: refseq_category <chr>, taxid <int>,
  species_taxid <int>, organism_name <chr>, infraspecific_name <chr>,
  isolate <chr>, version_status <chr>, assembly_level <chr>,
  release_type <chr>, genome_rep <chr>, seq_rel_date <date>,
  asm_name <chr>, submitter <chr>, gbrs_paired_asm <chr>,
  paired_asm_comp <chr>, ftp_path <chr>, excluded_from_refseq <chr>,
  kingdoms <chr>, group <chr>, subgroup <chr>, file_size_MB <dbl>,
  chrs <int>, organelles <int>, plasmids <int>, bio_projects <int>
```

The argument `db` specifies from which database (`refseq`, `genbank`, `ensembl` or `ensemblgenomes`) organism information shall be retrieved.

Users can determine the total number of available genomes using the `listGenomes()` function.

Example `refseq`:

```
length(listGenomes(db = "refseq"))
```

```
[1] 7879
```

Example `genbank`:

```
length(listGenomes(db = "genbank"))
```

```
[1] 6723
```

Example `ensembl`:

```
length(listGenomes(db = "ensembl"))
```

```
[1] 85
```

Example `ensemblgenomes`:

```
length(listGenomes(db = "ensemblgenomes"))
```

```
[1] 42529
```

Hence, currently 7879 genomes (including all kingdoms of life) are stored on NCBI RefSeq.

## Retrieving kingdom, group and subgroup information

Using this example users can retrieve the number of available species for each kingdom of life:

Example `refseq`:

```
# the number of genomes available for each kingdom
listKingdoms(db = "refseq")
```

|         |          |           |         |         |
|---------|----------|-----------|---------|---------|
| Archaea | Bacteria | Eukaryota | Viroids | Viruses |
| 78      | 1627     | 425       | 46      | 5703    |

Example genbank:

```
# the number of genomes available for each kingdom
listKingdoms(db = "genbank")
```

|         |          |           |
|---------|----------|-----------|
| Archaea | Bacteria | Eukaryota |
| 347     | 4876     | 1501      |

Example ENSEMBL:

```
# the number of genomes available for each kingdom
listKingdoms(db = "ensembl")
```

|         |
|---------|
| Ensembl |
| 85      |

Example ENSEMBLGENOMES:

```
# the number of genomes available for each kingdom
listKingdoms(db = "ensemblgenomes")
```

|                 |              |                |               |
|-----------------|--------------|----------------|---------------|
| EnsemblBacteria | EnsemblFungi | EnsemblMetazoa | EnsemblPlants |
| 41610           | 634          | 65             | 44            |
| EnsemblProtists |              |                |               |
| 176             |              |                |               |

Analogous computations can be performed for groups and subgroups

Unfortunately, ENSEMBL and ENSEMBLGENOMES do not provide group or subgroup information. Therefore, group and subgroup listings are limited to refseq and genbank.

Example refseq:

```
# the number of genomes available for each group
listGroups(db = "refseq")
```

|                             |                |
|-----------------------------|----------------|
| Acidobacteria               | Animals        |
| 11                          | 293            |
| Avsunviroidae               | Deltavirus     |
| 4                           | 1              |
| dsDNA viruses, no RNA stage | dsRNA viruses  |
| 2572                        | 261            |
| Elusimicrobia               | Euryarchaeota  |
| 1                           | 64             |
| FCB group                   | Fungi          |
| 155                         | 34             |
| Fusobacteria                | Nitrospirae    |
| 6                           | 3              |
| Other                       | Plants         |
| 10                          | 62             |
| Pospiviroidae               | Proteobacteria |
| 34                          | 774            |
| Protists                    | PVC group      |
| 34                          | 20             |
| Retro-transcribing viruses  | Satellites     |



|                               |                       |
|-------------------------------|-----------------------|
| 135                           | 213                   |
| Spirochaetes                  | ssDNA viruses         |
| 12                            | 864                   |
| ssRNA viruses                 | Synergistetes         |
| 1432                          | 1                     |
| TACK group                    | Terrabacteria group   |
| 13                            | 630                   |
| Thermodesulfobacteria         | Thermotogae           |
| 3                             | 2                     |
| unassigned viruses            | unclassified Archaea  |
| 9                             | 1                     |
| unclassified archaeal viruses | unclassified Bacteria |
| 3                             | 9                     |
| unclassified phages           | unclassified viroids  |
| 23                            | 8                     |
| unclassified virophages       | unclassified viruses  |
| 6                             | 176                   |

```
# the number of genomes available for each subgroup
head(listSubgroups(db = "refseq"), 15)
```

|                            |                   |
|----------------------------|-------------------|
| Acidithiobacillia          | Acidobacteriia    |
| 2                          | 8                 |
| Actinobacteria             | Adenoviridae      |
| 194                        | 55                |
| Alloherpesviridae          | Alphaflexiviridae |
| 7                          | 48                |
| Alphaproteobacteria        | Alphatetraviridae |
| 256                        | 3                 |
| Alvernaviridae             | Amalgaviridae     |
| 1                          | 4                 |
| Amphibians                 | Ampullaviridae    |
| 3                          | 3                 |
| Anelloviridae              | Apicomplexans     |
| 53                         | 16                |
| Apple fruit crinkle viroid |                   |
| 1                          |                   |

Example genbank:

```
# the number of genomes available for each group
listGroups(db = "genbank")
```

|                                              |                 |
|----------------------------------------------|-----------------|
| Acidobacteria                                | Animals         |
| 47                                           | 655             |
| Caldiserica                                  | Deferribacteres |
| 1                                            | 1               |
| DPANN group                                  | Elusimicrobia   |
| 27                                           | 57              |
| environmental samples                        | Euryarchaeota   |
| 6                                            | 197             |
| FCB group                                    | Fungi           |
| 545                                          | 508             |
| Fusobacteria Nitrospinae/Tectomicrobia group |                 |
| 7                                            | 11              |
| Nitrospirae                                  | Other           |

|                       |  |                       |
|-----------------------|--|-----------------------|
| 46                    |  | 7                     |
| Plants                |  | Proteobacteria        |
| 193                   |  | 1490                  |
| Protists              |  | PVC group             |
| 142                   |  | 180                   |
| Spirochaetes          |  | Synergistetes         |
| 26                    |  | 12                    |
| TACK group            |  | Terrabacteria group   |
| 73                    |  | 1072                  |
| Thermodesulfobacteria |  | Thermotogae           |
| 3                     |  | 9                     |
| unclassified Archaea  |  | unclassified Bacteria |
| 48                    |  | 1407                  |

```
# the number of genomes available for each subgroup
head(listSubgroups(db = "genbank"), 15)
```

|                          |                              |
|--------------------------|------------------------------|
| Acidithiobacillia        | Acidobacteriia               |
| 5                        | 9                            |
| Actinobacteria           | Alphaproteobacteria          |
| 313                      | 411                          |
| Amphibians               | Apicomplexans                |
| 4                        | 32                           |
| Archaea candidate phyla  | Archaeoglobi                 |
| 25                       | 3                            |
| Armatimonadetes          | Ascomycetes                  |
| 10                       | 361                          |
| Bacteria candidate phyla | Bacteroidetes/Chlorobi group |
| 1372                     | 405                          |
| Basidiomycetes           | Betaproteobacteria           |
| 122                      | 268                          |
| Birds                    |                              |
| 59                       |                              |

**Note** that when running the `listGenomes()` function for the first time, it might take a while until the function returns any results, because necessary information need to be downloaded from NCBI and ENSEMBL databases. All subsequent executions of `listGenomes()` will then respond very fast, because they will access the corresponding files stored on your hard drive.

## Downloading Biological Sequences and Annotations

After checking for the availability of sequence information for an organism of interest, the next step is to download the corresponding genome, proteome, CDS, or GFF file. The following functions allow users to download proteomes, genomes, CDS and GFF files from several database resources such as: NCBI RefSeq, NCBI Genbank, ENSEMBL and ENSEMBLGENOMES. When a corresponding proteome, genome, CDS or GFF file was loaded to your hard-drive, a documentation `*.txt` file is generated storing `File Name`, `Organism`, `Database`, `URL`, `DATE`, `assembly_accession`, `bioproject`, `biosample`, `taxid`, `version_status`, `release_type`, `seq_rel_date` etc. information of the retrieved file. This way a better reproducibility of proteome, genome, CDS and GFF versions used for subsequent data analyses can be achieved.

### Genome Retrieval

The easiest way to download a genome is to use the `getGenome()` function.







```

                                organism = "Arabidopsis thaliana",
                                path      = file.path("_ncbi_downloads","genomes") )

# import downloaded genome as Biostrings object
Cress_Genome <- read_genome(file      = AT.genome.ensemblgenomes,
                           obj.type = "Biostrings")

# look at the Biostrings object
Cress_Genome

A DNAStringSet instance of length 7
  width seq                                     names
[1] 30427671 CCCTAAACCCTAAACCCTAAACCCT...AGGGTTTAGGGTTTAGGGTTTAGGG 1 dna:chromosome ...
[2] 19698289 NNNNNNNNNNNNNNNNNNNNNNNNNNNNN...AGGGTTTAGGGTTTAGGGTTTAGGG 2 dna:chromosome ...
[3] 23459830 NNNNNNNNNNNNNNNNNNNNNNNNNNNNN...ACCCTAAACCCTAAACCCTAAACCC 3 dna:chromosome ...
[4] 18585056 NNNNNNNNNNNNNNNNNNNNNNNNNNNNN...AAGGGTTTAGGGTTTAGGGTTTAGG 4 dna:chromosome ...
[5] 26975502 TATACCATGTACCCTCAACCTTAAA...GTTTAGGATTTAGGGTTTTAGATC 5 dna:chromosome ...
[6] 366924 GGATCCGTTGAAACAGGTTAGCCT...TCGAGAATGGAAACAAACCGGATT Mt dna:chromosome...
[7] 154478 ATGGGCGAACGACGGGAATTGAACC...TCATAATAACTTGGTCCCAGGCATC Pt dna:chromosome...

```

## Proteome Retrieval

The `getProteome()` function is an interface function to the NCBI RefSeq, NCBI Genbank, ENSEMBL and ENSEMBLGENOMES databases from which corresponding proteomes can be retrieved. It works analogous to `getGenome()`.

The `db` argument specifies from which database proteomes in `*.fasta` file format shall be retrieved.

Options are:

- `db = "refseq"` for retrieval from NCBI RefSeq
- `db = "genbank"` for retrieval from NCBI Genbank
- `db = "ensembl"` for retrieval from ENSEMBL
- `db = "ensemblgenomes"` for retrieval from ENSEMBLGENOMES

Furthermore, again users need to specify the scientific name of the organism of interest for which a proteomes shall be downloaded, e.g. `organism = "Homo sapiens"`. Finally, the `path` argument specifies the folder path in which the corresponding proteome shall be locally stored. In case users would like to store the proteome file at a different location, they can specify the `path = file.path("put","your","path","here")` argument.

Example RefSeq:

```

# download the proteome of Homo sapiens from refseq
# and store the corresponding proteome file in '_ncbi_downloads/proteomes'
HS.proteome.refseq <- getProteome( db      = "refseq",
                                organism = "Homo sapiens",
                                path     = file.path("_ncbi_downloads","proteomes"))

```

In this example, `getProteome()` creates a directory named `'_ncbi_downloads/proteomes'` into which the corresponding genome named `GCF_000001405.34_GRCh38.p8_protein.faa.gz` is downloaded. The return value of `getProteome()` is the folder path to the downloaded proteome file that can then be used as input to the `read_proteome()` function. The variable `HS.proteome.refseq` stores the path to the downloaded proteome. Subsequently, users can use the `read_proteome()` function to import the proteome into the R session. Users can choose to work with the proteome sequence in R either as Biostrings object (`obj.type = "Biostrings"`) or data.table object (`obj.type = "data.table"`) by specifying the `obj.type` argument of the `read_proteome()` function.

```
# import proteome as Biostrings object
Human_Proteome <- read_proteome(file = HS.proteome.refseq,
                                obj.type = "Biostrings")
```

```
Human_Proteome
```

```
A AAStringSet instance of length 109018
      width seq                                     names
[1]  1474 MGKNKLLHPSLVLLLLVLLPTDAS...DYYETDEFAIAEYNAPCSKDLGNA NP_000005.2 alpha...
[2]   290 MDIEAYFERIGYKNSRNKLDLETL...LRNIFKISLGRNLVPKPGDGLTI NP_000006.2 aryla...
[3]   421 MAAGFGRCCRVLRSISRFWRSQH...QIYEGTSQIQLRLIVAREHIDKYKN NP_000007.1 mediu...
[4]   412 MAAALLARASGPARRALCPRAWRQ...EIYEGTSEIQLRLVIAGHLLRSYRS NP_000008.1 short...
[5]   655 MQAARMAASLGRQLLRLGGSSRL...RNFKSISKALVERGGVVTSNPLGF NP_000009.1 very ...
...
[109014] 98 MPLIYMNIMLAFTISLLGMLVYRS...LALLVSISNTYGLDYVHNLNLLQC YP_003024034.1 NA...
[109015] 459 MLKLIVPTIMLLPLTWLSKKHMIW...LMFMHLSPIILLSLNPDIIITGFSS YP_003024035.1 NA...
[109016] 603 MTMHTMTTLTSLIPPILTTLV...QKGMIKLYFLSFFFPLILTLLIT YP_003024036.1 NA...
[109017] 174 MMYALFLLSVGLVMGFVGFSSKPS...WLVVVTGWTLFVGVYIVIEIARGN YP_003024037.1 NA...
[109018] 380 MTPMRKTNPLMKLINHSFIDLPTP...LYFTTILILMPTISLIENKMLKWA YP_003024038.1 cy...
```

Alternatively, users can perform the pipeline logic of the magrittr package:

```
# install.packages("magrittr")
library(magrittr)
# import proteome as Biostrings object
Human_Proteome <- getProteome( db      = "refseq",
                               organism = "Homo sapiens",
                               path     = file.path("_ncbi_downloads","proteomes")) %>%
  read_proteome(obj.type = "Biostrings")
```

```
Human_Proteome
```

```
A AAStringSet instance of length 109018
      width seq                                     names
[1]  1474 MGKNKLLHPSLVLLLLVLLPTDAS...DYYETDEFAIAEYNAPCSKDLGNA NP_000005.2 alpha...
[2]   290 MDIEAYFERIGYKNSRNKLDLETL...LRNIFKISLGRNLVPKPGDGLTI NP_000006.2 aryla...
[3]   421 MAAGFGRCCRVLRSISRFWRSQH...QIYEGTSQIQLRLIVAREHIDKYKN NP_000007.1 mediu...
[4]   412 MAAALLARASGPARRALCPRAWRQ...EIYEGTSEIQLRLVIAGHLLRSYRS NP_000008.1 short...
[5]   655 MQAARMAASLGRQLLRLGGSSRL...RNFKSISKALVERGGVVTSNPLGF NP_000009.1 very ...
...
[109014] 98 MPLIYMNIMLAFTISLLGMLVYRS...LALLVSISNTYGLDYVHNLNLLQC YP_003024034.1 NA...
[109015] 459 MLKLIVPTIMLLPLTWLSKKHMIW...LMFMHLSPIILLSLNPDIIITGFSS YP_003024035.1 NA...
[109016] 603 MTMHTMTTLTSLIPPILTTLV...QKGMIKLYFLSFFFPLILTLLIT YP_003024036.1 NA...
[109017] 174 MMYALFLLSVGLVMGFVGFSSKPS...WLVVVTGWTLFVGVYIVIEIARGN YP_003024037.1 NA...
[109018] 380 MTPMRKTNPLMKLINHSFIDLPTP...LYFTTILILMPTISLIENKMLKWA YP_003024038.1 cy...
```

Example Genbank:

```
# download the proteome of Homo sapiens from genbank
# and store the corresponding proteome file in '_ncbi_downloads/proteomes'
HS.proteome.genbank <- getProteome( db      = "genbank",
                                   organism = "Homo sapiens",
                                   path     = file.path("_ncbi_downloads","proteomes"))
```

```
# import proteome as Biostrings object
Human_Proteome <- read_proteome(file = HS.proteome.genbank,
                                obj.type = "Biostrings")
```

## Human\_Proteome

```
A AAStringSet instance of length 13
width seq                               names
[1] 318 MPMANLLLLLIVPILIAMAFMLTERK...FLPLTLALLMWYVSMPTISSIPPQT AAB58943.1 NADH d...
[2] 347 MNPLAQPIVYSTIFAGTLITALSSHW...PTPFLPTLIALTLLLPISPFLMIL AAB58944.1 NADH d...
[3] 513 MFADRWLFSTNHKDIGTLYLLFGAWA...PSMNLEWLYGPPPYHTFEFPVYMKS AAB58945.1 cytoch...
[4] 227 MAHAAQVGLQDATSPIMEELITFHDH...ANHSFMPIVLELIPLKIFEMGPVFTL AAB58946.1 cytoch...
[5] 68 MPQLNTTVWPTMITPMLLTLFLITQL...KMKNYNKPWEPKWTKICSLHSLPPQS AAB58947.1 ATPase...
... ..
[9] 98 MPLIYMNIMLAFTISLLGMLVYRSHL...VGLALLVSISNTYGLDYVHNLNLLQC AAB58951.1 NADH d...
[10] 459 MLKLIVPTIMLLPLTWLSKXHMWIN...NTLMFMHLSPIILLSLNPDIITGFSS AAB58952.1 NADH d...
[11] 603 MTMHTTMTTLTSLIPIILTTLVNP...STQKGMIKLYFLSFFFPLIITLIT AAB58953.1 NADH d...
[12] 174 MMYALFLLSVGLVMGFVGFSSKPSPI...GRWLVVVTGWTLFVGVYIVIEIARGN AAB58954.1 NADH d...
[13] 380 MTPMRKTNPLMKLINHSFIDLPTPSN...SVLYFTTILILMPTISLIENKMLKWA AAB58955.3 cytoch...
```

Example ENSEMBL:

```
# download the proteome of Homo sapiens from ENSEMBL
# and store the corresponding proteome file in '_ncbi_downloads/proteomes'
HS.proteome.ensembl <- getProteome( db = "ensembl",
                                   organism = "Homo sapiens",
                                   path = file.path("_ncbi_downloads", "proteomes"))

# import proteome as Biostrings object
Human_Proteome <- read_proteome(file = HS.proteome.ensembl,
                                obj.type = "Biostrings")
```

## Human\_Proteome

```
A AAStringSet instance of length 102915
width seq                               names
[1] 4 TGGY                                ENSP00000452494.1...
[2] 4 GTGG                                ENSP00000488240.1...
[3] 4 GTGG                                ENSP00000487941.1...
[4] 3 PSY                                  ENSP00000451515.1...
[5] 2 EI                                    ENSP00000451042.1...
... ..
[102911] 554 MLLPLLLSLLGGSQAMDGRFWIR...GVRPRPEARMPKGTQADYAEVKFQ ENSP00000414324.2...
[102912] 639 MLLPLLLSLLGGSQAMDGRFWIR...GVRPRPEARMPKGTQADYAEVKFQ ENSP00000389132.2...
[102913] 697 MLLPLLLSLLGGSQAMDGRFWIR...GVRPRPEARMPKGTQADYAEVKFQ ENSP00000345243.4...
[102914] 155 MLLPLLLSLLGVLSFTPRPDH...SGRYTCRAENRLGSQQRALDLSVQ ENSP00000435281.1...
[102915] 186 MRRCYCHCCCPCRWADWTGSTPAY...HFSVLSFTPRPDHNTDLTCHVDF ENSP00000433838.1...
```

Example ENSEMBLGENOMES:

Due to the unavailability of "Homo sapiens" at db = "ensemblgenomes" here we choose "Arabidopsis thaliana" as example.

```
# download the proteome of Arabidopsis thaliana from ENSEMBLGENOMES
# and store the corresponding proteome file in '_ncbi_downloads/proteomes'
AT.proteome.ensemblgenomes <- getProteome( db = "ensemblgenomes",
                                             organism = "Arabidopsis thaliana",
                                             path = file.path("_ncbi_downloads", "proteomes"))

# import proteome as Biostrings object
Cress_Proteome <- read_proteome(file = AT.proteome.ensemblgenomes,
                                obj.type = "Biostrings")
```



## Cress\_Proteome

```
A AAStringSet instance of length 35386
      width seq                                     names
[1]   415 MGRDETETYITVPSFFKCPISLDVM...IKVLKFNSSALAAAYETKTTHIMPF AT3G18710.1 pep:k...
[2]   855 MATENPIRISGSNERWSNSRKVSVP...YTYGKHIVSRLEQPSIEENQELRR AT4G25880.2 pep:k...
[3]   858 MATENPIRISGSNERWSNSRKVSVP...GKHIVSRLEQPSIEGMKFPNKTKN AT4G25880.3 pep:k...
[4]   861 MATENPIRISGSNERWSNSRKVSVP...YTYGKHIVSRLEQPSIEENQELRR AT4G25880.1 pep:k...
[5]   358 MTKAYSTRVLTFLILISLMAVTLNL...CSARNTQSFMSVLEEGIEEAISMI AT1G71695.1 pep:k...
...   ...   ...
[35382] 374 MHSRSALLYRFLRPASRCFSSSSAV...YKAGEYYIKSMIEADRVASPSTSP AT2G20860.1 pep:k...
[35383] 392 MADNLSVSVLGVLLVLTIFHNPII...WEPNNLAIRRRPSRDFYLGAAAY AT3G14210.1 pep:k...
[35384] 495 MASLLSPATPTATSAAFHSCSTAGF...LRHPYFLLGGDQAAA VLSKLSFSK AT5G01920.1 pep:k...
[35385] 563 MSLTKKASEPKLSGTSIKPTTLNPH...VAVQRYLLEEEGLDYSEPQAGLLR AT2G26280.1 pep:k...
[35386] 453 MGVSLKQKQHRITNQADTFSRFMER...NHQQQQQQRSELRVENGLANNVI AT4G32600.1 pep:k...
```

## CDS Retrieval

The `getCDS()` function is an interface function to the NCBI RefSeq, NCBI Genbank, ENSEMBL and ENSEMBLGENOMES databases from which corresponding CDS files can be retrieved. It works analogous to `getGenome()` and `getProteome()`.

The `db` argument specifies from which database proteomes in `*.fasta` file format shall be retrieved.

Options are:

- `db = "refseq"` for retrieval from NCBI RefSeq
- `db = "genbank"` for retrieval from NCBI Genbank
- `db = "ensembl"` for retrieval from ENSEMBL
- `db = "ensemblgenomes"` for retrieval from ENSEMBLGENOMES

Furthermore, again users need to specify the scientific name of the organism of interest for which a proteomes shall be downloaded, e.g. `organism = "Homo sapiens"`. Finally, the `path` argument specifies the folder path in which the corresponding CDS file shall be locally stored. In case users would like to store the CDS file at a different location, they can specify the `path = file.path("put", "your", "path", "here")` argument.

Example RefSeq:

```
# download the genome of Homo sapiens from refseq
# and store the corresponding genome CDS file in '_ncbi_downloads/CDS'
HS.cds.refseq <- getCDS( db       = "refseq",
                        organism = "Homo sapiens",
                        path      = file.path("_ncbi_downloads", "CDS"))
```

In this example, `getCDS()` creates a directory named `'_ncbi_downloads/CDS'` into which the corresponding genome named `Homo_sapiens_cds_from_genomic_refseq.fna.gz` is downloaded. The return value of `getCDS()` is the folder path to the downloaded genome file that can then be used as input to the `read_cds()` function. The variable `HS.cds.refseq` stores the path to the downloaded CDS file. Subsequently, users can use the `read_cds()` function to import the genome into the R session. Users can choose to work with the genome sequence in R either as Biostrings object (`obj.type = "Biostrings"`) or data.table object (`obj.type = "data.table"`) by specifying the `obj.type` argument of the `read_cds()` function.

```
# import downloaded CDS as Biostrings object
Human_CDS <- read_cds(file      = HS.cds.refseq,
                     obj.type = "Biostrings")
```

```
# look at the Biostrings object
Human_CDS
```

```
A BStringSet instance of length 114967
      width seq
[1] 918 ATGGTGA...CACATTCTAGTG...
[2] 402 ATGAGTGACAGCATCAACTTCTCT...
[3] 402 ATGAGTGACAGCATCAACTTCTCT...
[4] 402 ATGAGTGACAGCATCAACTTCTCT...
[5] 402 ATGAGTGACAGCATCAACTTCTCT...
...
[114963] 297 ATGCCCTCATTACATAAATATT...
[114964] 1378 ATGCTAAACTAATCGTCCCAACA...
[114965] 1812 ATAACCATGCACACTACTATAACC...
[114966] 525 ATGATGTATGCTTTGTTTCTGTTG...
[114967] 1141 ATGACCCAATACGCAAACTAAC...
      names
lcl|NC_000001.11_...
lcl|NC_000001.11_...
lcl|NC_000001.11_...
lcl|NC_000001.11_...
lcl|NC_000001.11_...
...
lcl|NC_012920.1_c...
lcl|NC_012920.1_c...
lcl|NC_012920.1_c...
lcl|NC_012920.1_c...
lcl|NC_012920.1_c...
lcl|NC_012920.1_c...
```

Internally, a text file named `doc_Homo_sapiens_db_refseq.txt` is generated. The information stored in this log file is structured as follows:

```
File Name: Homo_sapiens_cds_from_genomic_refseq.fna.gz
Organism Name: Homo_sapiens
Database: NCBI refseq
URL: ftp://ftp.ncbi.nlm.nih.gov/genomes/all/GCF/000/001/405/
GCF_000001405.35_GRCh38.p9/GCF_000001405.35_GRCh38.p9_cds_from_genomic.fna.gz
Download_Date: Sun Oct 23 17:19:05 2016
refseq_category: reference genome
assembly_accession: GCF_000001405.35
bioproject: PRJNA168
biosample: NA
taxid: 9606
infraspecific_name: NA
version_status: latest
release_type: Patch
genome_rep: Full
seq_rel_date: 2016-09-26
submitter: Genome Reference Consortium
```

In summary, the `getCDS()` and `read_cds()` functions allow users to retrieve CDS files by specifying the scientific name of the organism of interest and allow them to import the retrieved CDS file e.g. as `Biostrings` object. Thus, users can then perform the `Biostrings` notation to work with downloaded CDS and can rely on the log file generated by `getCDS()` to better document the source and version of CDS used for subsequent studies.

Alternatively, users can perform the pipeline logic of the `magrittr` package:

```
# install.packages("magrittr")
library(magrittr)
# import CDS as Biostrings object
Human_CDS <- getCDS( db = "refseq",
                    organism = "Homo sapiens",
                    path = file.path("_ncbi_downloads", "CDS")) %>%
  read_cds(obj.type = "Biostrings")
```

```
Human_CDS
```

```
A BStringSet instance of length 114967
```

```

      width seq                                     names
[1]   918 ATGGTGAAGTGAATTCATTTTCTG...CACATTCTAGTGTAAGTTTTAG 1c1|NC_000001.11_...
[2]   402 ATGAGTGACAGCATCAACTTCTCT...CAGGACCCAGGCACAGGCATTAG 1c1|NC_000001.11_...
[3]   402 ATGAGTGACAGCATCAACTTCTCT...CAGGACCCAGGCACAGGCATTAG 1c1|NC_000001.11_...
[4]   402 ATGAGTGACAGCATCAACTTCTCT...CAGGACCCAGGCACAGGCATTAG 1c1|NC_000001.11_...
[5]   402 ATGAGTGACAGCATCAACTTCTCT...CAGGACCCAGGCACAGGCATTAG 1c1|NC_000001.11_...
...
[114963] 297 ATGCCCTCATTACATAAAATATT...ACCTAAACCTACTCCAATGCTAA 1c1|NC_012920.1_c...
[114964] 1378 ATGCTAAAATAATCGTCCCAACA...CATCATTACCGGGTTTTCTCTT 1c1|NC_012920.1_c...
[114965] 1812 ATAACCATGCACACTACTATAACC...TAACCCTACTCCTAATCACATAA 1c1|NC_012920.1_c...
[114966] 525 ATGATGTATGCTTTGTTTCTGTTG...TTGAGATTGCTCGGGGAATAGG 1c1|NC_012920.1_c...
[114967] 1141 ATGACCCAATACGCAAACTAAC...AAACAAAATACTCAAATGGGCCT 1c1|NC_012920.1_c...

```

Example Genbank:

```

# download the genome of Homo sapiens from genbank
# and store the corresponding genome CDS file in '_ncbi_downloads/CDS'
HS.cds.genbank <- getCDS( db       = "genbank",
                        organism = "Homo sapiens",
                        path      = file.path("_ncbi_downloads","CDS"))

```

```

# import downloaded CDS as Biostrings object
Human_CDS <- read_cds(file      = HS.cds.genbank,
                     obj.type = "Biostrings")

```

```

# look at the Biostrings object
Human_CDS

```

```

A BStringSet instance of length 13
      width seq                                     names
[1]   956 ATACCCATGGCCAACCTCCTACTCCT...ATCTCCAGCATTCCCCCTCAAACCTA 1c1|J01415.2_cds_...
[2]  1042 ATTAATCCCCTGGCCCAACCCGTCAT...CTCCCCTTTTATACTAATAATCTTAT 1c1|J01415.2_cds_...
[3]  1542 ATGTTCCGCCGACCGTTGACTATTCTC...AGAACCCGTATACATAAAATCTAGA 1c1|J01415.2_cds_...
[4]   684 ATGGCACATGCAGCGCAAGTAGGTCT...AAATAGGGCCCGTATTTACCCTATAG 1c1|J01415.2_cds_...
[5]   207 ATGCCCAACTAAATACTACCGTATG...TTCATTCTGCCCCACAATCCTAG 1c1|J01415.2_cds_...
...
[9]   297 ATGCCCTCATTACATAAAATATTAT...ATAACCTAAACCTACTCCAATGCTAA 1c1|J01415.2_cds_...
[10] 1378 ATGCTAAAATAATCGTCCCAACAAT...CGACATCATTACCGGGTTTTCTCTT 1c1|J01415.2_cds_...
[11] 1812 ATAACCATGCACACTACTATAACCAC...TCCTAACCTACTCCTAATCACATAA 1c1|J01415.2_cds_...
[12] 525 ATGATGTATGCTTTGTTTCTGTTGAG...TAATTGAGATTGCTCGGGGAATAGG 1c1|J01415.2_cds_...
[13] 1141 ATGACCCAATACGCAAACTAACCC...TGAAAACAAAATACTCAAATGGGCCT 1c1|J01415.2_cds_...

```

Example ENSEMBL:

```

# download the genome of Homo sapiens from ensembl
# and store the corresponding genome CDS file in '_ncbi_downloads/CDS'
HS.cds.ensembl <- getCDS( db       = "ensembl",
                        organism = "Homo sapiens",
                        path      = file.path("_ncbi_downloads","CDS"))

```

```

# import downloaded CDS as Biostrings object
Human_CDS <- read_cds(file      = HS.cds.ensembl,
                     obj.type = "Biostrings")

```

```

# look at the Biostrings object
Human_CDS

```

```

A BStringSet instance of length 102915

```

```

      width seq
[1]    13 ACTGGGGGATACG
[2]    12 GGGACAGGGGGC
[3]    12 GGGACAGGGGGC
[4]     9 CCTTCCTAC
[5]     8 GAAATAGT
...
[102911] 1665 ATGCTACTGCCACTGCTGCTGTCC...ATGCAGAAGTCAAGTTCCAATGA ENST00000436984.6...
[102912] 1920 ATGCTACTGCCACTGCTGCTGTCC...ATGCAGAAGTCAAGTTCCAATGA ENST00000439889.6...
[102913] 2094 ATGCTACTGCCACTGCTGCTGTCC...ATGCAGAAGTCAAGTTCCAATGA ENST00000339313.9...
[102914]  466 ATGCTACTGCCACTGCTGCTGTCC...AGCCCTGGACCTCTCTGTGCAGT ENST00000529627.1...
[102915]  559 ATGCGGAGATGCTACTGCCACTGC...CCTCACCTGCCATGTGGACTTCT ENST00000530476.1...

```

Example ENSEMBLGENOMES:

Due to the inavailability of "Homo sapiens" at db = "ensemblgenomes" here we choose "Arabidopsis thaliana" as example.

```

# download the genome of Homo sapiens from ensemblgenomes
# and store the corresponding genome CDS file in '_ncbi_downloads/CDS'
AT.cds.ensemblgenomes <- getCDS( db      = "ensemblgenomes",
                                organism = "Arabidopsis thaliana",
                                path     = file.path("_ncbi_downloads","CDS"))

```

```

# import downloaded CDS as Biostrings object
Cress_CDS <- read_cds(file      = AT.cds.ensemblgenomes,
                     obj.type = "Biostrings")

```

```

# look at the Biostrings object
Cress_CDS

```

```

A BStringSet instance of length 35386
      width seq
[1]  1248 ATGGGGAGAGATGAAACAGAGACGT...ACTACTCATATTATGCCTTTTTGA AT3G18710.1 cds:k...
[2]  2568 ATGGCAACTGAGAATCCTATTAGGA...GAAAACCAAGAATTGAGGAGATGA AT4G25880.2 cds:k...
[3]  2577 ATGGCAACTGAGAATCCTATTAGGA...TTCCCAATAAAAACCAAGAATTGA AT4G25880.3 cds:k...
[4]  2586 ATGGCAACTGAGAATCCTATTAGGA...GAAAACCAAGAATTGAGGAGATGA AT4G25880.1 cds:k...
[5]  1077 ATGACAAAGGCTTATTCAACACGTG...GAGGAAGCTATTTCCATGATCTAA AT1G71695.1 cds:k...
...
[35382] 1125 ATGCATTGCGCTCCGCTTGCTCT...GCTTCTCCTTCTACATCCCCGTAG AT2G20860.1 cds:k...
[35383] 1179 ATGGCAGACAATTTGAATTTGGTGA...TTGGGCCTCGCCGCTATTATTAG AT3G14210.1 cds:k...
[35384] 1488 ATGGCCTCTCTTCTCTCTCCCGCA...TCAAAGCTCAGTTTCAGCAAGTGA AT5G01920.1 cds:k...
[35385] 1689 ATGAGTTTAAACAAAGAAAGCAAGTG...GAACCACAGGCCGGTCTCCTTAGA AT2G26280.1 cds:k...
[35386] 1362 ATGGGTGTTTCTTCTTCTGAAACAAC...GGTTTGCCAATAATGTTATCTAG AT4G32600.1 cds:k...

```

## Retrieve the annotation file of a particular genome

Finally, users can download the corresponding annotation .gff files for particular genomes of interest using the `getGFF()` function.

Example RefSeq:

```

# download the GFF file of Homo sapiens from refseq
# and store the corresponding file in '_ncbi_downloads/annotation'
HS.gff.refseq <- getGFF( db      = "refseq",
                        organism = "Homo sapiens",
                        path     = file.path("_ncbi_downloads","annotation"))

```

After downloading the .gff file, users can import the .gff file with read\_gff().

```
# import downloaded GFF file
Human_GFF <- read_gff(file = HS.gff.refseq)
```

Human\_GFF

|    | seqid        | source     | type       | start | end       | score | strand | phase |
|----|--------------|------------|------------|-------|-----------|-------|--------|-------|
|    | <chr>        | <chr>      | <chr>      | <int> | <int>     | <dbl> | <chr>  | <dbl> |
| 1  | NC_000001.11 | RefSeq     | region     | 1     | 248956422 | 0     | +      | 0     |
| 2  | NC_000001.11 | BestRefSeq | gene       | 11874 | 14409     | 0     | +      | 0     |
| 3  | NC_000001.11 | BestRefSeq | transcript | 11874 | 14409     | 0     | +      | 0     |
| 4  | NC_000001.11 | BestRefSeq | exon       | 11874 | 12227     | 0     | +      | 0     |
| 5  | NC_000001.11 | BestRefSeq | exon       | 12613 | 12721     | 0     | +      | 0     |
| 6  | NC_000001.11 | BestRefSeq | exon       | 13221 | 14409     | 0     | +      | 0     |
| 7  | NC_000001.11 | BestRefSeq | gene       | 14362 | 29370     | 0     | -      | 0     |
| 8  | NC_000001.11 | BestRefSeq | transcript | 14362 | 29370     | 0     | -      | 0     |
| 9  | NC_000001.11 | BestRefSeq | exon       | 29321 | 29370     | 0     | -      | 0     |
| 10 | NC_000001.11 | BestRefSeq | exon       | 24738 | 24891     | 0     | -      | 0     |

Example Genbank:

```
# download the GFF file of Homo sapiens from genbank
# and store the corresponding file in '_ncbi_downloads/annotation'
HS.gff.genbank <- getGFF( db = "genbank",
                        organism = "Homo sapiens",
                        path = file.path("_ncbi_downloads","annotation"))
```

After downloading the .gff file, users can import the .gff file with read\_gff().

```
# import downloaded GFF file
Human_GFF <- read_gff(file = HS.gff.genbank)
```

Human\_GFF

|    | seqid      | source  | type       | start     | end       | score | strand | phase |
|----|------------|---------|------------|-----------|-----------|-------|--------|-------|
|    | <chr>      | <chr>   | <chr>      | <int>     | <int>     | <dbl> | <chr>  | <dbl> |
| 1  | CM000663.2 | Genbank | region     | 1         | 248956422 | 0     | +      | 0     |
| 2  | CM000663.2 | Genbank | centromere | 122026460 | 125184587 | 0     | +      | 0     |
| 3  | KI270706.1 | Genbank | region     | 1         | 175055    | 0     | +      | 0     |
| 4  | KI270707.1 | Genbank | region     | 1         | 32032     | 0     | +      | 0     |
| 5  | KI270708.1 | Genbank | region     | 1         | 127682    | 0     | +      | 0     |
| 6  | KI270709.1 | Genbank | region     | 1         | 66860     | 0     | +      | 0     |
| 7  | KI270710.1 | Genbank | region     | 1         | 40176     | 0     | +      | 0     |
| 8  | KI270711.1 | Genbank | region     | 1         | 42210     | 0     | +      | 0     |
| 9  | KI270712.1 | Genbank | region     | 1         | 176043    | 0     | +      | 0     |
| 10 | KI270713.1 | Genbank | region     | 1         | 40745     | 0     | +      | 0     |

Example ENSEMBL:

```
# download the GFF file of Homo sapiens from ENSEMBL
# and store the corresponding file in '_ncbi_downloads/annotation'
HS.gff.ensembl <- getGFF( db = "ensembl",
                        organism = "Homo sapiens",
                        path = file.path("_ncbi_downloads","annotation"))
```

After downloading the .gff file, users can import the .gff file with read\_gff().

```
# import downloaded GFF file
Human_GFF <- read_gff(file = HS.gff.ensembl)
```

```
Human_GFF
```

|    | seqid | source | type              | start       | end   | score   | strand | phase |
|----|-------|--------|-------------------|-------------|-------|---------|--------|-------|
|    | <int> | <chr>  | <chr>             | <int>       | <int> | <chr>   | <chr>  | <dbl> |
| 1  | 1     | GRCh38 | chromosome        | 1 248956422 |       | .       | .      | 0     |
| 2  | 1     | .      | biological_region | 10469       | 11240 | 1.3e+03 | .      | 0     |
| 3  | 1     | .      | biological_region | 10650       | 10657 | 0.999   | +      | 0     |
| 4  | 1     | .      | biological_region | 10655       | 10657 | 0.999   | -      | 0     |
| 5  | 1     | .      | biological_region | 10678       | 10687 | 0.999   | +      | 0     |
| 6  | 1     | .      | biological_region | 10681       | 10688 | 0.999   | -      | 0     |
| 7  | 1     | .      | biological_region | 10707       | 10716 | 0.999   | +      | 0     |
| 8  | 1     | .      | biological_region | 10708       | 10718 | 0.999   | -      | 0     |
| 9  | 1     | .      | biological_region | 10735       | 10747 | 0.999   | -      | 0     |
| 10 | 1     | .      | biological_region | 10737       | 10744 | 0.999   | +      | 0     |

Example ENSEMBLGENOMES:

Due to the inavailability of "Homo sapiens" at db = "ensemblgenomes" here we choose "Arabidopsis thaliana" as example.

```
# download the GFF file of Arabidopsis thaliana from ENSEMBLGENOMES
# and store the corresponding file in '_ncbi_downloads/annotation'
AT.gff.ensemblgenomes <- getGFF( db = "ensemblgenomes",
                                organism = "Arabidopsis thaliana",
                                path = file.path("_ncbi_downloads", "annotation"))
```

After downloading the .gff file, users can import the .gff file with read\_gff().

```
# import downloaded GFF file
Cress_GFF <- read_gff(file = AT.gff.ensemblgenomes)
```

```
Cress_GFF
```

|    | seqid | source | type           | start      | end   | score | strand | phase |
|----|-------|--------|----------------|------------|-------|-------|--------|-------|
|    | <int> | <chr>  | <chr>          | <int>      | <int> | <dbl> | <chr>  | <dbl> |
| 1  | 1     | TAIR   | chromosome     | 1 30427671 |       | 0     | .      | 0     |
| 2  | 1     | tair   | gene           | 3631       | 5899  | 0     | +      | 0     |
| 3  | 1     | tair   | transcript     | 3631       | 5899  | 0     | +      | 0     |
| 4  | 1     | tair   | five_prime_UTR | 3631       | 3759  | 0     | +      | 0     |
| 5  | 1     | tair   | exon           | 3631       | 3913  | 0     | +      | 0     |
| 6  | 1     | tair   | CDS            | 3760       | 3913  | 0     | +      | 0     |
| 7  | 1     | tair   | exon           | 3996       | 4276  | 0     | +      | 0     |
| 8  | 1     | tair   | CDS            | 3996       | 4276  | 0     | +      | 2     |
| 9  | 1     | tair   | exon           | 4486       | 4605  | 0     | +      | 0     |
| 10 | 1     | tair   | CDS            | 4486       | 4605  | 0     | +      | 0     |

Taken together, getGFF() in combination with getGenome(), getProteome() and getCDS() allows users to retrieve the genome information together with the corresponding .gff annotation file to make sure that they both have the same version and origin.

## Perform Meta-Genome Retrieval

The number of genome sequences generated and stored in sequence databases is growing exponentially every day. With the availability of this growing amount of data, meta-genomics studies become more popular and

useful for finding patterns within genomes by comparing them to thousands of other genomes. However, the first step in any meta-genomics study is the retrieval of the genomes that shall be compared or investigated.

For this purpose, I implemented the `meta.retrieval()` function to allow users to perform easy meta-genome retrieval in R.

The `getKingdoms()` function stores a list of all available kingdoms of life. Using the argument `db` users can specify from which database kingdom information shall be retrieved.

Example RefSeq:

```
getKingdoms(db = "refseq")
```

```
[1] "archaea"          "bacteria"          "fungi"             "invertebrate"
[5] "plant"           "protozoa"          "vertebrate_mammalian" "vertebrate_other"
[9] "viral"
```

Example Genbank:

```
getKingdoms(db = "genbank")
```

```
[1] "archaea"          "bacteria"          "fungi"
[4] "invertebrate"    "plant"             "protozoa"
[7] "vertebrate_mammalian" "vertebrate_other"
```

In these examples the difference between `db = "refseq"` and `db = "genbank"` is that `db = "genbank"` does not store viral information.

These kingdoms can be specified in `meta.retrieval()`.

The `meta.retrieval()` function aims to simplify the genome retrieval process for subsequent meta-genomics studies.

Usually this step is performed with `shell` scripts. However, since many meta-genomics packages exist for the R programming language, I implemented this functionality for easy integration into existing workflows.

For example, the pipeline logic of the `magrittr` package can be used with `meta.retrieval()`.

```
# download all vertebrate genomes, then apply ...
meta.retrieval(kingdom = "vertebrate_mammalian", db = "refseq", type = "genome") %>% ...
```

Here `...` denotes any subsequent meta-genomics analysis. Hence, `meta.retrieval()` enables the pipelining methodology for meta-genomics.

The `meta.retrieval()` function can retrieve genomes, proteomes, and CDS files.

## Retrieve Genomic Sequences

Download all mammalian vertebrate genomes from RefSeq.

```
# download all vertebrate genomes
meta.retrieval(kingdom = "vertebrate_mammalian", db = "refseq", type = "genome")
```

All genomes are stored in the folder named according to the kingdom. In this case `vertebrate_mammalian`. Alternatively, users can specify the `out.folder` argument to define a custom output folder path.

Example Bacteria

```
# download all bacteria genomes
meta.retrieval(kingdom = "bacteria", db = "refseq", type = "genome")
```

Example Viruses

```
# download all virus genomes
meta.retrieval(kingdom = "viral", db = "refseq", type = "genome")
```

Example Archaea

```
# download all archaea genomes
meta.retrieval(kingdom = "archaea", db = "refseq", type = "genome")
```

Example Fungi

```
# download all fungi genomes
meta.retrieval(kingdom = "fungi", db = "refseq", type = "genome")
```

Example Plants

```
# download all plant genomes
meta.retrieval(kingdom = "plant", db = "refseq", type = "genome")
```

Example Invertebrates

```
# download all invertebrate genomes
meta.retrieval(kingdom = "invertebrate", db = "refseq", type = "genome")
```

Example Protozoa

```
# download all invertebrate genomes
meta.retrieval(kingdom = "protozoa", db = "refseq", type = "genome")
```

Alternatively, download all mammalian vertebrate genomes from Genbank, e.g.

```
# download all vertebrate genomes
meta.retrieval(kingdom = "vertebrate_mammalian", db = "genbank", type = "genome")
```

## Metagenome project retrieval from NCBI Genbank

NCBI Genbank stores metagenome projects in addition to species specific genome, proteome or CDS sequences. To retrieve these metagenomes users can perform the following combination of commands:

First, users can list the project names of available metagenomes by typing

```
# list available metagenomes at NCBI Genbank
listMetaGenomes()
```

```
[1] "metagenome" "human gut metagenome" "epibiont metagenome"
[4] "marine metagenome" "soil metagenome" "mine drainage metagenome"
[7] "mouse gut metagenome" "marine sediment metagenome" "termite gut metagenome"
[10] "hot springs metagenome" "human lung metagenome" "fossil metagenome"
[13] "freshwater metagenome" "saltern metagenome" "stromatolite metagenome"
[16] "coral metagenome" "mosquito metagenome" "fish metagenome"
[19] "bovine gut metagenome" "chicken gut metagenome" "wastewater metagenome"
[22] "microbial mat metagenome" "freshwater sediment metagenome" "human metagenome"
[25] "hydrothermal vent metagenome" "compost metagenome" "wallaby gut metagenome"
[28] "groundwater metagenome" "gut metagenome" "sediment metagenome"
[31] "ant fungus garden metagenome" "food metagenome" "hypersaline lake metagenome"
[34] "hydrocarbon metagenome" "activated sludge metagenome" "viral metagenome"
[37] "bioreactor metagenome" "wasp metagenome" "permafrost metagenome"
[40] "sponge metagenome" "aquatic metagenome" "insect gut metagenome"
[43] "activated carbon metagenome" "anaerobic digester metagenome" "rock metagenome"
[46] "terrestrial metagenome" "rock porewater metagenome" "seawater metagenome"
```



```
[49] "scorpion gut metagenome"          "soda lake metagenome"          "glacier metagenome"
```

Internally the `listMetaGenomes()` function downloads the `assembly_summary.txt` file from `ftp://ftp.ncbi.nlm.nih.gov/genomes/genbank/metagenomes/` to retrieve available metagenome information. This procedure might take a few seconds during the first run of `listMetaGenomes()`. Subsequently, the `assembly_summary.txt` file will be stored in the `tempdir()` directory to achieve a much faster access of this information during following uses of `listMetaGenomes()`.

In case users wish to retrieve detailed information about available metagenome projects they can specify the `details = TRUE` argument.

```
# detailed information on available metagenomes at NCBI Genbank
listMetaGenomes(details = TRUE)
```

```
# A tibble: 857 x 21
  assembly_accession bioproject biosample wgs_master refseq_category taxid species_taxid
      <chr>          <chr>      <chr>      <chr>      <chr>      <int>      <int>
1 GCA_000206185.1 PRJNA32359 SAMN02954317 AAGA000000000.1 na 256318 256318
2 GCA_000206205.1 PRJNA32355 SAMN02954315 AAFZ000000000.1 na 256318 256318
3 GCA_000206225.1 PRJNA32357 SAMN02954316 AAFY000000000.1 na 256318 256318
4 GCA_000208265.2 PRJNA17779 SAMN02954240 AASZ000000000.1 na 256318 256318
5 GCA_000208285.1 PRJNA17657 SAMN02954268 AAT000000000.1 na 256318 256318
6 GCA_000208305.1 PRJNA17659 SAMN02954269 AATN000000000.1 na 256318 256318
7 GCA_000208325.1 PRJNA16729 SAMN02954263 AAQL000000000.1 na 256318 256318
8 GCA_000208345.1 PRJNA16729 SAMN02954262 AAQK000000000.1 na 256318 256318
9 GCA_000208365.1 PRJNA13699 SAMN02954283 AAFX000000000.1 na 256318 256318
10 GCA_900010595.1 PRJEB11544 SAMEA3639840 CZPY000000000.1 na 256318 256318
# ... with 847 more rows, and 14 more variables: organism_name <chr>,
#   infraspecific_name <chr>, isolate <chr>, version_status <chr>,
#   assembly_level <chr>, release_type <chr>, genome_rep <chr>,
#   seq_rel_date <date>, asm_name <chr>, submitter <chr>,
#   gbrs_paired_asm <chr>, paired_asm_comp <chr>,
#   ftp_path <chr>, excluded_from_refseq <chr>
```

Finally, users can retrieve available metagenomes using `getMetaGenomes()`. The `name` argument receives the metagenome project name retrieved with `listMetaGenomes()`. The `path` argument specifies the folder path in which corresponding genomes shall be stored.

```
# retrieve all genomes belonging to the human gut metagenome project
getMetaGenomes(name = "human gut metagenome", path = file.path("_ncbi_downloads", "human_gut"))
```

```
1] "The metagenome of 'human gut metagenome' has been downloaded to '_ncbi_downloads/human_gut'."
[1] "_ncbi_downloads/human_gut/GCA_000205525.2_ASM20552v2_genomic.fna.gz"
[2] "_ncbi_downloads/human_gut/GCA_000205765.1_ASM20576v1_genomic.fna.gz"
[3] "_ncbi_downloads/human_gut/GCA_000205785.1_ASM20578v1_genomic.fna.gz"
[4] "_ncbi_downloads/human_gut/GCA_000207925.1_ASM20792v1_genomic.fna.gz"
[5] "_ncbi_downloads/human_gut/GCA_000207945.1_ASM20794v1_genomic.fna.gz"
[6] "_ncbi_downloads/human_gut/GCA_000207965.1_ASM20796v1_genomic.fna.gz"
[7] "_ncbi_downloads/human_gut/GCA_000207985.1_ASM20798v1_genomic.fna.gz"
[8] "_ncbi_downloads/human_gut/GCA_000208005.1_ASM20800v1_genomic.fna.gz"
[9] "_ncbi_downloads/human_gut/GCA_000208025.1_ASM20802v1_genomic.fna.gz"
[10] "_ncbi_downloads/human_gut/GCA_000208045.1_ASM20804v1_genomic.fna.gz"
[11] "_ncbi_downloads/human_gut/GCA_000208065.1_ASM20806v1_genomic.fna.gz"
[12] "_ncbi_downloads/human_gut/GCA_000208085.1_ASM20808v1_genomic.fna.gz"
[13] "_ncbi_downloads/human_gut/GCA_000208105.1_ASM20810v1_genomic.fna.gz"
[14] "_ncbi_downloads/human_gut/GCA_000208125.1_ASM20812v1_genomic.fna.gz"
[15] "_ncbi_downloads/human_gut/GCA_000208145.1_ASM20814v1_genomic.fna.gz"
[16] "_ncbi_downloads/human_gut/GCA_000208165.1_ASM20816v1_genomic.fna.gz"
...
```

Internally, `getMetaGenomes()` creates a folder specified in the `path` argument. Genomes associated with the metagenomes project specified in the `name` argument will then be downloaded and stored in this folder. As return value `getMetaGenomes()` returns the file paths to the genome files which can then be used as input to the `read*()` functions.

Alternatively or subsequent to the metagenome retrieval, users can retrieve annotation files of genomes belonging to a metagenome project selected with `listMetaGenomes()` by using the `getMetaGenomeAnnotations()` function.

```
# retrieve all genomes belonging to the human gut metagenome project
getMetaGenomeAnnotations(name = "human gut metagenome", path = file.path("_ncbi_downloads", "human_gut"),

[1] "The annotations of metagenome 'human gut metagenome'
have been downloaded and stored at '_ncbi_downloads/human_gut/annotations'."
 [1] "_ncbi_downloads/human_gut/annotations/GCA_000205525.2_ASM20552v2_genomic.gff.gz"
 [2] "_ncbi_downloads/human_gut/annotations/GCA_000205765.1_ASM20576v1_genomic.gff.gz"
 [3] "_ncbi_downloads/human_gut/annotations/GCA_000205785.1_ASM20578v1_genomic.gff.gz"
 [4] "_ncbi_downloads/human_gut/annotations/GCA_000207925.1_ASM20792v1_genomic.gff.gz"
 [5] "_ncbi_downloads/human_gut/annotations/GCA_000207945.1_ASM20794v1_genomic.gff.gz"
 [6] "_ncbi_downloads/human_gut/annotations/GCA_000207965.1_ASM20796v1_genomic.gff.gz"
 [7] "_ncbi_downloads/human_gut/annotations/GCA_000207985.1_ASM20798v1_genomic.gff.gz"
 [8] "_ncbi_downloads/human_gut/annotations/GCA_000208005.1_ASM20800v1_genomic.gff.gz"
 [9] "_ncbi_downloads/human_gut/annotations/GCA_000208025.1_ASM20802v1_genomic.gff.gz"
[10] "_ncbi_downloads/human_gut/annotations/GCA_000208045.1_ASM20804v1_genomic.gff.gz"
[11] "_ncbi_downloads/human_gut/annotations/GCA_000208065.1_ASM20806v1_genomic.gff.gz"
[12] "_ncbi_downloads/human_gut/annotations/GCA_000208085.1_ASM20808v1_genomic.gff.gz"
[13] "_ncbi_downloads/human_gut/annotations/GCA_000208105.1_ASM20810v1_genomic.gff.gz"
[13] "_ncbi_downloads/human_gut/annotations/GCA_000208105.1_ASM20810v1_genomic.gff.gz"
[14] "_ncbi_downloads/human_gut/annotations/GCA_000208125.1_ASM20812v1_genomic.gff.gz"
[15] "_ncbi_downloads/human_gut/annotations/GCA_000208145.1_ASM20814v1_genomic.gff.gz"
[16] "_ncbi_downloads/human_gut/annotations/GCA_000208165.1_ASM20816v1_genomic.gff.gz"
 ...
```

The file paths of the downloaded `*.gff` are returned by `getMetaGenomeAnnotations()` and can be used as input for the `read.gff()` function in the `seqreadr` package.

## Retrieve Protein Sequences

Download all mammalian vertebrate proteomes.

Example RefSeq:

```
# download all vertebrate genomes
meta.retrieval(kingdom = "vertebrate_mammalian", db = "refseq", type = "proteome")
```

Example Genbank:

```
# download all vertebrate genomes
meta.retrieval(kingdom = "vertebrate_mammalian", db = "genbank", type = "proteome")
```

## Retrieve CDS Sequences

Download all mammalian vertebrate CDS from RefSeq (Genbank does not store CDS data).

Example RefSeq:

```
# download all vertebrate genomes
meta.retrieval(kingdom = "vertebrate_mammalian", db = "refseq", type = "CDS")
```

Example Genbank:

```
# download all vertebrate genomes  
meta.retrieval(kingdom = "vertebrate_mammalian", db = "genbank", type = "CDS")
```

## Retrieve GFF files

Download all mammalian vertebrate gff files.

Example RefSeq:

```
# download all vertebrate gff files  
meta.retrieval(kingdom = "vertebrate_mammalian", db = "refseq", type = "gff")
```

Example Genbank:

```
# download all vertebrate gff files  
meta.retrieval(kingdom = "vertebrate_mammalian", db = "genbank", type = "gff")
```

Users can obtain alternative kingdoms using `getKingdoms()`.

## Retrieve Genomes for all kingdoms of life

If users wish to download the all genomes, proteome, CDS, or gff files for all species available in RefSeq or Genbank, they can use the `meta.retrieval.all()` function for this purpose.

### Genome Retrieval

Example RefSeq:

```
# download all genomes stored in RefSeq  
meta.retrieval.all(db = "refseq", type = "genome")
```

Example Genbank:

```
# download all genomes stored in Genbank  
meta.retrieval.all(db = "genbank", type = "genome")
```

### Proteome Retrieval

Example RefSeq:

```
# download all proteome stored in RefSeq  
meta.retrieval.all(db = "refseq", type = "proteome")
```

Example Genbank:

```
# download all proteome stored in Genbank  
meta.retrieval.all(db = "genbank", type = "proteome")
```

## Functional Annotation with BioMart

The BioMart project enables users to retrieve a vast diversity of annotation data for specific organisms. Steffen Durinck and Wolfgang Huber provide an powerful interface between the R language and BioMart by providing the R package `biomaRt`. The following sections will introduce users to the functionality and data retrieval

procedures using the `biomaRt` package and will then introduce them to the interface functions `biomart()` and `biomart_organisms()` implemented in `biomartr` that are based on the `biomaRt` methodology but aim to introduce an more intuitive way of interacting with BioMart.

## Getting Started with `biomaRt`

The best way to get started with the methodology presented by the established `biomaRt` package is to understand the workflow of data retrieval. The database provided by BioMart is organized in so called: `marts`, `datasets`, and `attributes`. So when users want to retrieve information for a specific organism of interest, first they need to specify the `marts` and `datasets` in which the information of the corresponding organism can be found. Subsequently they can specify the `attributes` argument that is ought to be returned for the corresponding organism.

The availability of `marts`, `datasets`, and `attributes` can be checked by the following functions:

```
# install the biomaRt package
source("http://bioconductor.org/biocLite.R")
biocLite("biomaRt")

# load biomaRt
library(biomaRt)

# look at top 10 databases
head(listMarts(host = "www.ensembl.org"), 10)
```

|   | biomart              | version               |
|---|----------------------|-----------------------|
| 1 | ENSEMBL_MART_ENSEMBL | Ensembl Genes 83      |
| 2 | ENSEMBL_MART_SNP     | Ensembl Variation 83  |
| 3 | ENSEMBL_MART_FUNCGEN | Ensembl Regulation 83 |
| 4 | ENSEMBL_MART_VEGA    | Vega 63               |
| 5 | pride                | PRIDE (EBI UK)        |

Users will observe that several `marts` providing annotation for specific classes of organisms or groups of organisms are available.

For our example, we will choose the `hsapiens_gene_ensembl` mart and list all available datasets that are element of this mart.

```
head(listDatasets(useMart("ENSEMBL_MART_ENSEMBL", host = "www.ensembl.org")), 10)
```

|    | dataset                        | description                                | version         |
|----|--------------------------------|--------------------------------------------|-----------------|
| 1  | oanatinus_gene_ensembl         | Ornithorhynchus anatinus genes (OANA5)     | OANA5           |
| 2  | cporcellus_gene_ensembl        | Cavia porcellus genes (cavPor3)            | cavPor3         |
| 3  | gaculeatus_gene_ensembl        | Gasterosteus aculeatus genes (BROADS1)     | BROADS1         |
| 4  | lafricana_gene_ensembl         | Loxodonta africana genes (loxAfr3)         | loxAfr3         |
| 5  | itridecemlineatus_gene_ensembl | Ictidomys tridecemlineatus genes (spetri2) | spetri2         |
| 6  | choffmanni_gene_ensembl        | Choloepus hoffmanni genes (choHof1)        | choHof1         |
| 7  | csavignyi_gene_ensembl         | Ciona savignyi genes (CSAV2.0)             | CSAV2.0         |
| 8  | fcatus_gene_ensembl            | Felis catus genes (Felis_catus_6.2)        | Felis_catus_6.2 |
| 9  | rnorvegicus_gene_ensembl       | Rattus norvegicus genes (Rnor_6.0)         | Rnor_6.0        |
| 10 | psinensis_gene_ensembl         | Pelodiscus sinensis genes (PelSin_1.0)     | PelSin_1.0      |

The `useMart()` function is a wrapper function provided by `biomaRt` to connect a selected BioMart database (`mart`) with a corresponding dataset stored within this mart.

We select dataset `hsapiens_gene_ensembl` and now check for available attributes (annotation data) that can be accessed for Homo sapiens genes.

```
head(listAttributes(useDataset(dataset = "hsapiens_gene_ensembl",
                             mart   = useMart("ENSEMBL_MART_ENSEMBL",
                             host   = "www.ensembl.org"))), 10)
```

|    | name                  | description           | page         |
|----|-----------------------|-----------------------|--------------|
| 1  | ensembl_gene_id       | Ensembl Gene ID       | feature_page |
| 2  | ensembl_transcript_id | Ensembl Transcript ID | feature_page |
| 3  | ensembl_peptide_id    | Ensembl Protein ID    | feature_page |
| 4  | ensembl_exon_id       | Ensembl Exon ID       | feature_page |
| 5  | description           | Description           | feature_page |
| 6  | chromosome_name       | Chromosome Name       | feature_page |
| 7  | start_position        | Gene Start (bp)       | feature_page |
| 8  | end_position          | Gene End (bp)         | feature_page |
| 9  | strand                | Strand                | feature_page |
| 10 | band                  | Band                  | feature_page |

Please note the nested structure of this attribute query. For an attribute query procedure an additional wrapper function named `useDataset()` is needed in which `useMart()` and a corresponding dataset needs to be specified. The result is a table storing the name of available attributes for *Homo sapiens* as well as a short description.

Furthermore, users can retrieve all filters for *Homo sapiens* that can be specified by the actual BioMart query process.

```
head(listFilters(useDataset(dataset = "hsapiens_gene_ensembl",
                             mart   = useMart("ENSEMBL_MART_ENSEMBL",
                             host   = "www.ensembl.org"))), 10)
```

|    | name               | description                                               |
|----|--------------------|-----------------------------------------------------------|
| 1  | chromosome_name    | Chromosome name                                           |
| 2  | start              | Gene Start (bp)                                           |
| 3  | end                | Gene End (bp)                                             |
| 4  | band_start         | Band Start                                                |
| 5  | band_end           | Band End                                                  |
| 6  | marker_start       | Marker Start                                              |
| 7  | marker_end         | Marker End                                                |
| 8  | encode_region      | Encode region                                             |
| 9  | strand             | Strand                                                    |
| 10 | chromosomal_region | Chromosome Regions (e.g 1:100:10000:-1,1:100000:200000:1) |

After accumulating all this information, it is now possible to perform an actual BioMart query by using the `getBM()` function.

In this example we will retrieve attributes: `start_position`, `end_position` and `description` for the *Homo sapiens* gene "GUCA2A".

Since the input genes are ensembl gene ids, we need to specify the `filters` argument `filters = "hgnc_symbol"`.

```
# 1) select a mart and data set
mart <- useDataset(dataset = "hsapiens_gene_ensembl",
                  mart   = useMart("ENSEMBL_MART_ENSEMBL",
                  host   = "www.ensembl.org"))

# 2) run a biomart query using the getBM() function
# and specify the attributes and filter arguments
geneSet <- "GUCA2A"
```

```
resultTable <- getBM(attributes = c("start_position", "end_position", "description"),
                    filters    = "hgnc_symbol",
                    values     = geneSet,
                    mart       = mart)
```

```
resultTable
```

```
  start_position end_position
1      42162691    42164718
                                description
1 guanylate cyclase activator 2A (guanylin) [Source:HGNC Symbol;Acc:HGNC:4682]
```

When using `getBM()` users can pass all attributes retrieved by `listAttributes()` to the `attributes` argument of the `getBM()` function.

## Getting Started with biomartr

This query methodology provided by BioMart and the `biomaRt` package is a very well defined approach for accurate annotation retrieval. Nevertheless, when learning this query methodology it (subjectively) seems non-intuitive from the user perspective. Therefore, the `biomartr` package provides another query methodology that aims to be more organism centric.

Taken together, the following workflow allows users to perform fast BioMart queries for attributes using the `biomaRt()` function implemented in this `biomartr` package:

- 1) get attributes, datasets, and marts via : `organismAttributes()`
- 2) choose available biological features (filters) via: `organismFilters()`
- 3) specify a set of query genes: e.g. retrieved with `getGenome()`, `getProteome()` or `getCDS()`
- 4) specify all arguments of the `biomaRt()` function using steps 1) - 3) and perform a BioMart query

**Note that dataset names change very frequently due to the update of dataset versions. So in case some query functions do not work properly, users should check with `organismAttributes(update = TRUE)` whether or not their dataset name has been changed. For example, `organismAttributes("Homo sapiens", topic = "id", update = TRUE)` might reveal that the dataset `ENSEMBL_MART_ENSEMBL` has changed.**

## Retrieve marts, datasets, attributes, and filters with biomartr

### Retrieve Available Marts

The `getMarts()` function allows users to list all available databases that can be accessed through BioMart interfaces.

```
# load the biomartr package
library(biomartr)

# list all available databases
getMarts()
```

```
      mart          version
1 ENSEMBL_MART_ENSEMBL  Ensembl Genes 87
2  ENSEMBL_MART_MOUSE   Mouse strains 87
```

```

3 ENSEMBL_MART_SEQUENCE           Sequence
4 ENSEMBL_MART_ONTOLOGY           Ontology
5 ENSEMBL_MART_GENOMIC           Genomic features 87
6 ENSEMBL_MART_SNP               Ensembl Variation 87
7 ENSEMBL_MART_FUNCGEN           Ensembl Regulation 87
8 ENSEMBL_MART_VEGA               Vega 67

```

## Retrieve Available Datasets from a Specific Mart

Now users can select a specific database to list all available datasets that can be accessed through this database. In this example we choose the ENSEMBL\_MART\_ENSEMBL database.

```
head(getDatasets(mart = "ENSEMBL_MART_ENSEMBL") , 5)
```

```

          dataset              description  version
1  oanatinus_gene_ensembl  Platypus genes (OANA5)  OANA5
2  cporcellus_gene_ensembl  Guinea Pig genes (cavPor3)  cavPor3
3  gaculeatus_gene_ensembl  Stickleback genes (BROAD S1)  BROAD S1
4  lafricana_gene_ensembl  Elephant genes (Loxafr3.0)  Loxafr3.0
5  itridecemlineatus_gene_ensembl  Squirrel genes (spetri2)  spetri2

```

Now you can select the dataset `hsapiens_gene_ensembl` and list all available attributes that can be retrieved from this dataset.

```
tail(getDatasets(mart = "ENSEMBL_MART_ENSEMBL") , 38)
```

```

          dataset
32  hsapiens_gene_ensembl
33  pformosa_gene_ensembl
34  tbelangeri_gene_ensembl
35  mfuro_gene_ensembl
36  ggallus_gene_ensembl
37  xtropicalis_gene_ensembl
38  ecaballus_gene_ensembl
39  pabelii_gene_ensembl
40  xmaculatus_gene_ensembl
41  drerio_gene_ensembl
42  tnigroviridis_gene_ensembl
43  lchalumnae_gene_ensembl
44  amelanoleuca_gene_ensembl
45  mmulatta_gene_ensembl
46  pvampyrus_gene_ensembl
47  panubis_gene_ensembl
48  mdomestica_gene_ensembl
49  acarolinensis_gene_ensembl
50  vpacos_gene_ensembl
51  tsyrichta_gene_ensembl
52  ogarnettii_gene_ensembl
53  dmelanogaster_gene_ensembl
54  loculatus_gene_ensembl
55  mmurinus_gene_ensembl
56  olatipes_gene_ensembl
57  oprinceps_gene_ensembl
58  ggorilla_gene_ensembl
59  dordii_gene_ensembl

```

60 oaries\_gene\_ensembl  
 61 mmusculus\_gene\_ensembl  
 62 mgallopavo\_gene\_ensembl  
 63 gmorhua\_gene\_ensembl  
 64 saraneus\_gene\_ensembl  
 65 aplatyrhynchos\_gene\_ensembl  
 66 sharrisii\_gene\_ensembl  
 67 btaurus\_gene\_ensembl  
 68 meugenii\_gene\_ensembl  
 69 cfamiliaris\_gene\_ensembl

|    | description                                 | version                |
|----|---------------------------------------------|------------------------|
| 32 | Human genes (GRCh38.p7)                     | GRCh38.p7              |
| 33 | Amazon molly genes (Poecilia_formosa-5.1.2) | Poecilia_formosa-5.1.2 |
| 34 | Tree Shrew genes (tupBel1)                  | tupBel1                |
| 35 | Ferret genes (MusPutFur1.0)                 | MusPutFur1.0           |
| 36 | Chicken genes (Gallus_gallus-5.0)           | Gallus_gallus-5.0      |
| 37 | Xenopus genes (JGI 4.2)                     | JGI 4.2                |
| 38 | Horse genes (Equ Cab 2)                     | Equ Cab 2              |
| 39 | Orangutan genes (PPYG2)                     | PPYG2                  |
| 40 | Platyfish genes (Xipmac4.4.2)               | Xipmac4.4.2            |
| 41 | Zebrafish genes (GRCz10)                    | GRCz10                 |
| 42 | Tetraodon genes (TETRAODON 8.0)             | TETRAODON 8.0          |
| 43 | Coelacanth genes (LatCha1)                  | LatCha1                |
| 44 | Panda genes (ailMel1)                       | ailMel1                |
| 45 | Macaque genes (Mmul_8.0.1)                  | Mmul_8.0.1             |
| 46 | Megabat genes (pteVam1)                     | pteVam1                |
| 47 | Olive baboon genes (PapAnu2.0)              | PapAnu2.0              |
| 48 | Opossum genes (monDom5)                     | monDom5                |
| 49 | Anole lizard genes (AnoCar2.0)              | AnoCar2.0              |
| 50 | Alpaca genes (vicPac1)                      | vicPac1                |
| 51 | Tarsier genes (tarSyr1)                     | tarSyr1                |
| 52 | Bushbaby genes (OtoGar3)                    | OtoGar3                |
| 53 | Fruitfly genes (BDGP6)                      | BDGP6                  |
| 54 | Spotted gar genes (LepOcu1)                 | LepOcu1                |
| 55 | Mouse Lemur genes (Mmur_2.0)                | Mmur_2.0               |
| 56 | Medaka genes (HdrR)                         | HdrR                   |
| 57 | Pika genes (OchPri2.0)                      | OchPri2.0              |
| 58 | Gorilla genes (gorGor3.1)                   | gorGor3.1              |
| 59 | Kangaroo rat genes (dipOrd1)                | dipOrd1                |
| 60 | Sheep genes (Oar_v3.1)                      | Oar_v3.1               |
| 61 | Mouse genes (GRCm38.p5)                     | GRCm38.p5              |
| 62 | Turkey genes (Turkey_2.01)                  | Turkey_2.01            |
| 63 | Cod genes (gadMor1)                         | gadMor1                |
| 64 | Shrew genes (sorAra1)                       | sorAra1                |
| 65 | Duck genes (BGI_duck_1.0)                   | BGI_duck_1.0           |
| 66 | Tasmanian devil genes (Devil_ref v7.0)      | Devil_ref v7.0         |
| 67 | Cow genes (UMD3.1)                          | UMD3.1                 |
| 68 | Wallaby genes (Meug_1.0)                    | Meug_1.0               |
| 69 | Dog genes (CanFam3.1)                       | CanFam3.1              |



## Retrieve Available Attributes from a Specific Dataset

Now that you have selected a database (`hsapiens_gene_ensembl`) and a dataset (`hsapiens_gene_ensembl`), users can list all available attributes for this dataset using the `getAttributes()` function.

```
# list all available attributes for dataset: hsapiens_gene_ensembl
head( getAttributes(mart      = "ENSEMBL_MART_ENSEMBL",
                    dataset = "hsapiens_gene_ensembl"), 10 )
```

|    | name                  | description              |
|----|-----------------------|--------------------------|
| 1  | ensembl_gene_id       | Gene ID                  |
| 2  | ensembl_transcript_id | Transcript ID            |
| 3  | ensembl_peptide_id    | Protein ID               |
| 4  | ensembl_exon_id       | Exon ID                  |
| 5  | description           | Description              |
| 6  | chromosome_name       | Chromosome/scaffold name |
| 7  | start_position        | Gene Start (bp)          |
| 8  | end_position          | Gene End (bp)            |
| 9  | strand                | Strand                   |
| 10 | band                  | Band                     |

## Retrieve Available Filters from a Specific Dataset

Finally, the `getFilters()` function allows users to list available filters for a specific dataset that can be used for a `biomart()` query.

```
# list all available filters for dataset: hsapiens_gene_ensembl
head( getFilters(mart      = "ENSEMBL_MART_ENSEMBL",
                 dataset = "hsapiens_gene_ensembl"), 10 )
```

|    | name               | description                                               |
|----|--------------------|-----------------------------------------------------------|
| 1  | chromosome_name    | Chromosome name                                           |
| 2  | start              | Gene Start (bp)                                           |
| 3  | end                | Gene End (bp)                                             |
| 4  | band_start         | Band Start                                                |
| 5  | band_end           | Band End                                                  |
| 6  | marker_start       | Marker Start                                              |
| 7  | marker_end         | Marker End                                                |
| 8  | encode_region      | Encode region                                             |
| 9  | strand             | Strand                                                    |
| 10 | chromosomal_region | Chromosome Regions (e.g 1:100:10000:-1,1:100000:200000:1) |

## Organism Specific Retrieval of Information

In most use cases, users will work with a single or a set of model organisms. In this process they will mostly be interested in specific annotations for this particular model organism. The `organismBM()` function addresses this issue and provides users with an organism centric query to `marts` and `datasets` which are available for a particular organism of interest.

**Note** that when running the following functions for the first time, the data retrieval procedure will take some time, due to the remote access to BioMart. The corresponding result is then saved in a `*.txt` file named `_biomart/listDatasets.txt` within the `tempdir()` folder, allowing subsequent queries to be performed much faster. The `tempdir()` folder, however, will be deleted after a new R session was established. In this case the initial call of the subsequent functions again will take time to retrieve all organism specific data from the BioMart database.

This concept of locally storing all organism specific database linking information available in BioMart into an internal file allows users to significantly speed up subsequent retrieval queries for that particular organism.

```
# retrieving all available datasets and biomart connections for
# a specific query organism (scientific name)
organismBM(organism = "Homo sapiens")
```

```

organism_name                                description
   <chr>                                     <chr>
1     hsapiens                                Human genes (GRCh38.p7)
2     hsapiens                                homo_sapiens sequences (GRCh38.p7)
3     hsapiens      Human Short Variants (SNPs and indels excluding flagged variants) (GRCh38.p7)
4     hsapiens                                Human Structural Variants (GRCh38.p7)
5     hsapiens                                Human Somatic Structural Variants (GRCh38.p7)
6     hsapiens Human Somatic Short Variants (SNPs and indels excluding flagged variants) (GRCh38.p7)
7     hsapiens                                Human Regulatory Evidence (GRCh38.p7)
8     hsapiens                                Human Binding Motifs (GRCh38.p7)
9     hsapiens                                Human Regulatory Features (GRCh38.p7)
10    hsapiens                                Human miRNA Target Regions (GRCh38.p7)
11    hsapiens                                Human Other Regulatory Regions (GRCh38.p7)
12    hsapiens                                Human genes (GRCh38.p7)
with 3 more variables: mart <chr>, dataset <chr>, version <chr>
```

The result is a table storing all `marts` and `datasets` from which annotations can be retrieved for *Homo sapiens*. Furthermore, a short description as well as the version of the dataset being accessed (very useful for publications) is returned.

Users will observe that 3 different `marts` provide 6 different `datasets` storing annotation information for *Homo sapiens*.

**Please note, however, that scientific names of organisms must be written correctly! For ex. “Homo Sapiens” will be treated differently (not recognized) than “Homo sapiens” (recognized).**

Similar to the `biomaRt` package query methodology, users need to specify `attributes` and `filters` to be able to perform accurate BioMart queries. Here the functions `organismAttributes()` and `organismFilters()` provide useful and intuitive concepts to obtain this information.

```
# return available attributes for "Homo sapiens"
head(organismAttributes("Homo sapiens"), 20)
```

```

name                                description
   <chr>                             <chr>
1     ensembl_gene_id                Gene ID
2     ensembl_transcript_id          Transcript ID
3     ensembl_peptide_id             Protein ID
4     ensembl_exon_id                Exon ID
5     description                    Description
6     chromosome_name                Chromosome/scaffold name
7     start_position                 Gene Start (bp)
8     end_position                   Gene End (bp)
9     strand                         Strand
10    band                           Band
11    transcript_start                Transcript Start (bp)
12    transcript_end                  Transcript End (bp)
13    transcription_start_site        Transcription Start Site (TSS)
14    transcript_length               Transcript length (including UTRs and CDS)
15    transcript_tsl                  Transcript Support Level (TSL)
16    transcript_gencode_basic        GENCODE basic annotation
```

```

17     transcript_appris                APPRIS annotation
18     external_gene_name              Associated Gene Name
19     external_gene_source            Associated Gene Source
20 external_transcript_name            Associated Transcript Name
    with 2 more variables: dataset <chr>, mart <chr>

```

Warning messages:

```

1: No attributes were available for mart = ENSEMBL_MART_SEQUENCE.
2: No attributes were available for mart = ENSEMBL_MART_SEQUENCE.
3: No attributes were available for mart = ENSEMBL_MART_SEQUENCE.
4: No attributes were available for mart = ENSEMBL_MART_SEQUENCE.
5: No attributes were available for mart = ENSEMBL_MART_SEQUENCE.

```

Users will observe that the `organismAttributes()` function returns a `data.frame` storing attribute names, datasets, and marts which are available for *Homo sapiens*. After the ENSEMBL release 87 the ENSEMBL\_MART\_SEQUENCE service provided by Ensembl does not work properly and thus the `organismAttributes()` function prints out warning messages to make the user aware when certain marts provided by Ensembl do not work properly, yet.

An additional feature provided by `organismAttributes()` is the `topic` argument. The `topic` argument allows users to search for specific attributes, topics, or categories for faster filtering.

```

# search for attribute topic "id"
head(organismAttributes("Homo sapiens", topic = "id"), 20)

```

|    | name<br><chr>            | description<br><chr>                             | dataset<br><chr>      |
|----|--------------------------|--------------------------------------------------|-----------------------|
| 1  | ensembl_gene_id          | Gene ID                                          | hsapiens_gene_ensembl |
| 2  | ensembl_transcript_id    | Transcript ID                                    | hsapiens_gene_ensembl |
| 3  | ensembl_peptide_id       | Protein ID                                       | hsapiens_gene_ensembl |
| 4  | ensembl_exon_id          | Exon ID                                          | hsapiens_gene_ensembl |
| 5  | study_external_id        | Study External Reference                         | hsapiens_gene_ensembl |
| 6  | go_id                    | GO Term Accession                                | hsapiens_gene_ensembl |
| 7  | dbass3_id                | Database of Aberrant 3 Splice Sites (DBASS3) IDs | hsapiens_gene_ensembl |
| 8  | dbass5_id                | Database of Aberrant 5 Splice Sites (DBASS5) IDs | hsapiens_gene_ensembl |
| 9  | hgnc_id                  | HGNC ID(s)                                       | hsapiens_gene_ensembl |
| 10 | mirbase_id               | miRBase ID(s)                                    | hsapiens_gene_ensembl |
| 11 | mim_morbid               | MIM MORBID                                       | hsapiens_gene_ensembl |
| 12 | protein_id               | Protein (Genbank) ID [e.g. AAA02487]             | hsapiens_gene_ensembl |
| 13 | refseq_peptide           | RefSeq Protein ID [e.g. NP_001005353]            | hsapiens_gene_ensembl |
| 14 | refseq_peptide_predicted | RefSeq Predicted Protein ID [e.g. XP_001720922]  | hsapiens_gene_ensembl |
| 15 | wikigene_id              | WikiGene ID                                      | hsapiens_gene_ensembl |
| 16 | ensembl_gene_id          | Gene ID                                          | hsapiens_gene_ensembl |
| 17 | ensembl_transcript_id    | Transcript ID                                    | hsapiens_gene_ensembl |
| 18 | ensembl_peptide_id       | Protein ID                                       | hsapiens_gene_ensembl |
| 19 | ensembl_exon_id          | Exon ID                                          | hsapiens_gene_ensembl |
| 20 | ensembl_gene_id          | Gene ID                                          | hsapiens_gene_ensembl |

with 1 more variables: mart <chr>

Now, all attribute names having `id` as part of their name are being returned.

Another example is `topic = "homolog"`.

```

# search for attribute topic "homolog"
head(organismAttributes("Homo sapiens", topic = "homolog"), 20)

```

|   | name<br><chr>               |
|---|-----------------------------|
| 1 | vpacos_homolog_ensembl_gene |

```

2     vpacos_homolog_associated_gene_name
3     vpacos_homolog_ensembl_peptide
4     vpacos_homolog_chromosome
5     vpacos_homolog_chrom_start
6     vpacos_homolog_chrom_end
7     vpacos_homolog_canonical_transcript_protein
8     vpacos_homolog_subtype
9     vpacos_homolog_orthology_type
10    vpacos_homolog_perc_id
11    vpacos_homolog_perc_id_r1
12    vpacos_homolog_goc_score
13    vpacos_homolog_wga_coverage
14    vpacos_homolog_dn
15    vpacos_homolog_ds
16    vpacos_homolog_orthology_confidence
17    pformosa_homolog_ensembl_gene
18    pformosa_homolog_associated_gene_name
19    pformosa_homolog_ensembl_peptide
20    pformosa_homolog_chromosome
with 3 more variables: description <chr>, dataset <chr>, mart <chr>

```

Or `topic = "dn"` and `topic = "ds"` for dn and ds value retrieval.

```

# search for attribute topic "dn"
head(organismAttributes("Homo sapiens", topic = "dn"))

```

A tibble: 6 × 4

|   | name<br><chr>                      | description<br><chr>     | dataset<br><chr>      | mart<br><chr>        |
|---|------------------------------------|--------------------------|-----------------------|----------------------|
| 1 | cdna_coding_start                  | cDNA coding start        | hsapiens_gene_ensembl | ENSEMBL_MART_ENSEMBL |
| 2 | cdna_coding_end                    | cDNA coding end          | hsapiens_gene_ensembl | ENSEMBL_MART_ENSEMBL |
| 3 | vpacos_homolog_dn                  | dN with Alpaca           | hsapiens_gene_ensembl | ENSEMBL_MART_ENSEMBL |
| 4 | pformosa_homolog_dn                | dN with Amazon molly     | hsapiens_gene_ensembl | ENSEMBL_MART_ENSEMBL |
| 5 | acarolinensis_homolog_dn           | dN with Anole lizard     | hsapiens_gene_ensembl | ENSEMBL_MART_ENSEMBL |
| 6 | dnovemcinctus_homolog_ensembl_gene | Armadillo gene stable ID | hsapiens_gene_ensembl | ENSEMBL_MART_ENSEMBL |

```

# search for attribute topic "ds"
head(organismAttributes("Homo sapiens", topic = "ds"))

```

|   | name<br><chr>       | description<br><chr> | dataset<br><chr>      | mart<br><chr>        |
|---|---------------------|----------------------|-----------------------|----------------------|
| 1 | ccds                | CCDS ID              | hsapiens_gene_ensembl | ENSEMBL_MART_ENSEMBL |
| 2 | cds_length          | CDS Length           | hsapiens_gene_ensembl | ENSEMBL_MART_ENSEMBL |
| 3 | cds_start           | CDS Start            | hsapiens_gene_ensembl | ENSEMBL_MART_ENSEMBL |
| 4 | cds_end             | CDS End              | hsapiens_gene_ensembl | ENSEMBL_MART_ENSEMBL |
| 5 | vpacos_homolog_ds   | dS with Alpaca       | hsapiens_gene_ensembl | ENSEMBL_MART_ENSEMBL |
| 6 | pformosa_homolog_ds | dS with Amazon molly | hsapiens_gene_ensembl | ENSEMBL_MART_ENSEMBL |

Analogous to the `organismAttributes()` function, the `organismFilters()` function returns all filters that are available for a query organism of interest.

```

# return available filters for "Homo sapiens"
head(organismFilters("Homo sapiens"), 20)

```

|   | name<br><chr>   | description<br><chr> |
|---|-----------------|----------------------|
| 1 | chromosome_name | Chromosome name      |

```

2           start           Gene Start (bp)
3           end             Gene End (bp)
4           band_start      Band Start
5           band_end        Band End
6           marker_start    Marker Start
7           marker_end      Marker End
8           encode_region   Encode region
9           strand          Strand
10          chromosomal_region Chromosome Regions (e.g 1:100:10000:-1,1:100000:200000:1)
11          with_hgnc        with HGNC ID(s)
12          with_hgnc_transcript_name with HGNC transcript name(s)
13          with_ox_arrayexpress with ArrayExpress ID(s)
14          with_ccds        with CCDS ID(s)
15          with_chembl      with ChEMBL ID(s)
16          with_ox_clone_based_ensembl_gene with clone based Ensembl gene ID(s)
17          with_ox_clone_based_ensembl_transcript with clone based Ensembl transcript ID(s)
18          with_ox_clone_based_vega_gene with clone based VEGA gene ID(s)
19          with_ox_clone_based_vega_transcript with clone based VEGA transcript ID(s)
20          with_dbass3      with DBASS3 ID(s)
with 2 more variables: dataset <chr>, mart <chr>

```

The `organismFilters()` function also allows users to search for filters that correspond to a specific topic or category.

```

# search for filter topic "id"
head(organismFilters("Homo sapiens", topic = "id"), 20)

```

```

           name           description
           <chr>           <chr>
1           with_go_id      with GO Term Accession(s)
2           with_mim_morbid with MIM MORBID ID(s)
3           with_protein_id with protein (Genbank) ID(s)
4           with_refseq_peptide with RefSeq protein ID(s)
5           with_refseq_peptide_predicted with RefSeq predicted protein ID(s)
6           ensembl_gene_id Gene ID(s) [e.g. ENSG00000139618]
7           ensembl_transcript_id Transcript ID(s) [e.g. ENST00000380152]
8           ensembl_peptide_id Protein ID(s) [e.g. ENSP00000369497]
9           ensembl_exon_id Exon ID(s) [e.g. ENSE00001508081]
10          hgnc_id         HGNC ID(s) [e.g. HGNC:8030]
11          go_id           GO Term Accession(s) [e.g. GO:0005515]
12          mim_morbid      MIM MORBID ID(s) [e.g. 100100]
13          mirbase_id      miRBase ID(s) [e.g. hsa-mir-137]
14          protein_id      Protein (Genbank) ID(s) [e.g. ACU09872]
15          refseq_peptide  RefSeq protein ID(s) [e.g. NP_001005353]
16          refseq_peptide_predicted RefSeq predicted protein ID(s) [e.g. XP_011520427]
17          wikigene_id     WikiGene ID(s) [e.g. 115286]
18          go_evidence_code GO Evidence code
19          with_itridecemlineatus_homolog Orthologous Squirrel Genes
20          with_tnigroviridis_homolog Orthologous Tetraodon Genes
with 2 more variables: dataset <chr>, mart <chr>

```

## Performing BioMart queries with biomarttr

The short introduction to the functionality of `organismBM()`, `organismAttributes()`, and `organismFilters()` will allow users to perform BioMart queries in a very intuitive organism centric way. The main function to perform BioMart queries is `biomart()`.

For the following examples we will assume that we are interested in the annotation of specific genes from the *Homo sapiens* proteome. We want to map the corresponding refseq gene id to a set of other gene ids used in other databases. For this purpose, first we need consult the `organismAttributes()` function.

```
head(organismAttributes("Homo sapiens", topic = "id"))
```

|   | name                  | description              | dataset               | mart                 |
|---|-----------------------|--------------------------|-----------------------|----------------------|
|   | <chr>                 | <chr>                    | <chr>                 | <chr>                |
| 1 | ensembl_gene_id       | Gene ID                  | hsapiens_gene_ensembl | ENSEMBL_MART_ENSEMBL |
| 2 | ensembl_transcript_id | Transcript ID            | hsapiens_gene_ensembl | ENSEMBL_MART_ENSEMBL |
| 3 | ensembl_peptide_id    | Protein ID               | hsapiens_gene_ensembl | ENSEMBL_MART_ENSEMBL |
| 4 | ensembl_exon_id       | Exon ID                  | hsapiens_gene_ensembl | ENSEMBL_MART_ENSEMBL |
| 5 | study_external_id     | Study External Reference | hsapiens_gene_ensembl | ENSEMBL_MART_ENSEMBL |
| 6 | go_id                 | GO Term Accession        | hsapiens_gene_ensembl | ENSEMBL_MART_ENSEMBL |

```
# retrieve the proteome of Homo sapiens from refseq
```

```
file_path <- getProteome( db       = "refseq",  
                        organism = "Homo sapiens",  
                        path      = file.path("_ncbi_downloads", "proteomes") )
```

```
Hsapiens_proteome <- read_proteome(file_path, format = "fasta")
```

```
# remove splice variants from id
```

```
gene_set <- unlist(sapply(strsplit(Hsapiens_proteome@ranges@NAMES[1:5], "."), function(x) :
```

```
result_BM <- biomart( genes   = gene_set,  
                    mart     = "ENSEMBL_MART_ENSEMBL",  
                    dataset  = "hsapiens_gene_ensembl",  
                    attributes = c("ensembl_gene_id", "ensembl_peptide_id"),  
                    filters   = "refseq_peptide")
```

```
result_BM
```

|   | refseq_peptide | ensembl_gene_id | ensembl_peptide_id |
|---|----------------|-----------------|--------------------|
| 1 | NP_000005      | ENSG00000175899 | ENSP00000323929    |
| 2 | NP_000006      | ENSG00000156006 | ENSP00000286479    |
| 3 | NP_000007      | ENSG00000117054 | ENSP00000359878    |
| 4 | NP_000008      | ENSG00000122971 | ENSP00000242592    |
| 5 | NP_000009      | ENSG00000072778 | ENSP00000349297    |

The `biomart()` function takes as arguments a set of genes (gene ids specified in the `filter` argument), the corresponding `mart` and `dataset`, as well as the `attributes` which shall be returned.

## Gene Ontology

The `biomarttr` package also enables a fast and intuitive retrieval of GO terms and additional information via the `getGO()` function. Several databases can be selected to retrieve GO annotation information for a set of query genes. So far, the `getGO()` function allows GO information retrieval from the BioMart database.

In this example we will retrieve GO information for a set of *Homo sapiens* genes stored as `hgnc_symbol`.

## GO Annotation Retrieval via BioMart

The `getGO()` function takes several arguments as input to retrieve GO information from BioMart. First, the scientific name of the `organism` of interest needs to be specified. Furthermore, a set of `gene ids` as well as their corresponding `filter` notation (`GUCA2A` gene ids have `filter` notation `hgnc_symbol`; see `organismFilters()` for details) need to be specified. The `database` argument then defines the database from which GO information shall be retrieved.

```
# search for GO terms of an example Homo sapiens gene
```

```
GO_tbl <- getGO(organism = "Homo sapiens",  
               genes    = "GUCA2A",  
               filters  = "hgnc_symbol")
```

```
GO_tbl
```

|   | hgnc_symbol | goslim_goa_description                       | goslim_goa_accession |
|---|-------------|----------------------------------------------|----------------------|
| 1 | GUCA2A      | cellular_component                           | GO:0005575           |
| 2 | GUCA2A      | extracellular region                         | GO:0005576           |
| 3 | GUCA2A      | biological_process                           | GO:0008150           |
| 4 | GUCA2A      | cellular nitrogen compound metabolic process | GO:0034641           |
| 5 | GUCA2A      | small molecule metabolic process             | GO:0044281           |
| 6 | GUCA2A      | biosynthetic process                         | GO:0009058           |
| 7 | GUCA2A      | molecular_function                           | GO:0003674           |
| 8 | GUCA2A      | organelle                                    | GO:0043226           |
| 9 | GUCA2A      | enzyme regulator activity                    | GO:0030234           |

Hence, for each *gene id* the resulting table stores all annotated GO terms found in BioMart.
